# Supplementary material for: Genetic and phenotypic intra-species variation in Candida albicans
Source: HighWire-hosted journal article supplement (doi:10.1101/gr.174623.114), 2014-12-11
Supplement: Supp_Material.docx [file Supp_Material.docx]

**Supplementary Information, Supplementary Figures S1-S12, and Supplementary Tables S1-S18 for:**

**Genetic and Phenotypic Intra-Species Variation in *Candida albicans***

Matthew P. Hirakawa, Diego A. Martinez†, Sharadha Sakthikumar†, Matthew Anderson, Aaron Berlin, Sharvari Gujja, Qiandong Zeng, Ethan Zisson, Joshua M. Wang, Joshua M. Greenberg, Judith Berman, Richard J. Bennett†*, Christina A. Cuomo†*

**Supplementary Information 5**

Growth rates 5

Filamentous growth in clinical isolates 6

Biofilm formation 7

Drug resistance 8

Analysis of aneuploid isolates 10

Telomere analysis of *C. albicans* isolates 11

Substitution Rates and Evolutionary Selection in Clinical Isolates 12

Predicted loss of function in coding regions 13

Loss of *EFG1* function in P94105 and phenotypic analysis 14

**Supplementary Methods**

*C. albicans* strains, plasmids and media 17

Virulence score 18

Growth rates 18

Stress resistance 19

Biofilms 19

Antifungal Drug Resistance 20

Filamentation Assays 20

*Galleria* *mellonella* infections 21

DNA staining and flow cytometry 22

Light Microscopy 23

Scanning electron microscopy 23

Whole genome sequencing and variant identification 23

Phylogenetic analysis of SNPs and MLST loci 26

Assembly and annotation 27

Variants affecting coding regions 29

Telomere Analysis 30

RNA extraction, sequencing, and differential expression analysis 30

Murine competition experiments 31

**Supplementary Figures 33**

Figure S1. Dendrogram of MLST loci 33

Figure S2. Evaluation of virulence in the *G. mellonella* model 34

Figure S3. Filamentation of strains in RPMI medium 35

Figure S4. Analysis of subtelomeric regions across isolates 36

Figure S5. Distribution of omega values across chromosomes 37

Figure S6. Characterization of gene-disrupting mutation types 38

Figure S7. DNA staining of clinical isolates and FACS analysis 39

Figure S8. Chromosome ploidy changes in sequenced isolates 40

Figure S9. Phenotypic analysis of isolate P94015 41

Figure S10. Comparison of expression profiles in P94015, opaque, grey and GUT cells 42

Figure S11. Colony phenotypes of SC5314 expressing different *EFG1* alleles 43

Figure S12. Commensal fitness of P94015 versus P94015+*EFG1* strains 44

Figure S13. Drug resistance levels in sequenced isolates 45

**Supplementary Tables 46**

Table S1. Characteristics of sequenced isolates 46

Table S2. Genome sequencing statistics 47

Table S3. MLST typing and resulting diploid sequence type 48

Table S4. Genome assembly and gene prediction statistics 49

Table S5. Correlations between phenotypic and genotypic traits 50

Table S6. Growth rates 51

Table S7. Drug MIC values 52

Table S8. *FUR1* mutations in sequenced isolates. 53

Table S9. *ERG11* mutations in sequenced isolates 54

Table S10. Differential expression of genes involved in drug resistance 55

Table S11. Copy number variation in the sequenced isolates 56

Table S12. Subtelomeric *TLO* genes 57

Table S13. Inversions in the sequenced isolates 58

Table S14. Nucleotide substitution (*d*N, *d*S, omega) values for each gene 59

Table S15. Homozygous SNPs resulting in nonsense mutations 59

Table S16**.** Indel mutations resulting in premature stop codons 59

Table S17. Strains constructed in this study 59

Table S18. RNA-Seq based differential expression of P94015 and P60002 59

**References 60**

**Supplementary Information**

***Growth rates***

The set of 21 clinical *C. albicans* isolates were grown under several culture conditions and their doubling times determined. A previous study by MacCullum *et al*. ([MacCallum et al. 2009](#_ENREF_41)) found a significant correlation between growth rates and virulence when analyzing a set of 43 natural *C. albicans* isolates. However, a separate study found that slower growth ofgene deletion strains *in vitro* did not correlate with decreased virulence ([Noble et al. 2010](#_ENREF_45)). In rich YPD medium at 30°C, doubling times of the 21 isolates ranged from ~95 minutes to ~140 minutes, with a median doubling time of ~105 minutes (**Table S6**). The fastest dividing strains under these conditions were SC5314, P75016 and P34048, while the slowest growing strains were P76067, P94015 and P37037. A correlation was observed between faster growth rates at 30°C in YPD and higher levels of genome heterozygosity (p < 0.027, *rs* = 0.48, Spearman's rank-order correlation). A correlation was also observed between faster growth rates and strains being euploid compared to aneuploid (p < 0.001, Student’s t-test) (**Table S5**).

Growth rates in YPD medium at 37°C were faster than those at 30°C, with doubling times from ~70 to ~140 minutes and a median doubling time of ~85 minutes (**Table S6**). Growth rates in YPD at 37°C did not show significant correlations with virulence, genome heterozygosity or ploidy. Growth in minimal media, SCD and Spider media at 30°C resulted in slower growth than in YPD, and all exhibited median doubling times of ~125 minutes. No correlations were observed between growth rates in minimal media, SCD or Spider medium at 30°C and virulence (**Table S5**).

Overall, growth rates of strains across different conditions did not correlate with virulence in mice or in *G. mellonella* (**Table S5**). In contrast, MacCullum *et al*. tested a set of 43 strains and showed that virulence in the murine systemic model of infection correlated with faster growth rates in RPMI 1640 medium at 40°C ([MacCallum et al. 2009](#_ENREF_41)). We were unable to accurately measure growth rates using these conditions as the strains became too clumpy due to filamentation. Thus, while growth rates can provide a general indicator of virulence, we emphasize that *C. albicans* virulence is a complex trait affected by multiple factors.

***Filamentous growth in clinical isolates***

Clinical isolates were tested using several standard filament-inducing conditions including growth on solid Spider medium at 30°C and 37°C, growth in liquid YPD medium supplemented with 10% fetal bovine serum (FBS) at 37°C, and growth in liquid RPMI medium at 37°C. Filamentation levels on solid media were quantified using a modified M-score, in which agar invasion at the colony periphery was measured together with the percentage of filamentous colonies (see Methods). On Spider medium at 30°C, filamentation scores ranged from 0 to 100, with a median filamentation score of 17.4 (**Figure 2B**). Strains SC5314 and P76067 exhibited the highest filamentation scores; both strains showed strong peripheral filamentation in 100% of colonies. Several strains rarely formed filaments under these conditions; P94015, GC75, and P34048 had scores of 0, 0.4, and 2.0, respectively. On Spider medium at 37°C filamentation again varied widely from strain to strain, with a median filamentation score of 5.7 (**Figure 2B**). Strains SC5314 and P76067 were again among the most filamentous, while strains P94015 and P57072 did not filament. Overall, there was a strong correlation between M-scores on Spider medium at 30°C and 37°C (p < 6.3e-5, *rs =* 0.76).

In liquid RPMI medium at 37°C all filamentous cells were pseudohyphal as defined by Sudbery ([Sudbery 2011](#_ENREF_65)). Strains SC5314 and P87 showed the most filamentation, with ~95% of cells being filamentous, while strains 12C, P94015, and P37037 did not filament in RPMI (**Figure S3**). There was a significant correlation between filamentous growth in RPMI medium at 37°C and Spider medium at 37°C (p < 0.022, *rs* = 0.49, Spearman's rank-order correlation). In general, across all conditions tested, strains SC5314, P87, and P76067 exhibited the most robust filamentation phenotypes, while strain P94015 was completely defective in filament formation.

***Biofilm formation***

To test the ability of clinical isolates to form biofilms, we used an established assay to measure biomass accumulated on silicone elastomer in Spider medium at 37°C ([Nobile and Mitchell 2005](#_ENREF_44); [Nobile et al. 2012](#_ENREF_43)). P87, SC5314, and GC75 formed biofilms efficiently with average biomasses of 8.9 mg, 7.5 mg and 7.2 mg, respectively (**Figure 2C**). Notably, SC5314 and P87 strains also exhibited higher filamentation scores compared to other isolates (see above). In contrast, strain P94015 formed the weakest biofilms with an average biomass of 0.61 mg, consistent with this isolate showing weak filamentous growth (**Figure 2B** and **C**). A significant correlation was found between biofilm formation and filamentation when filamentation assays were also performed at 37°C (Spider medium, p < 0.0498, *rs* = 0.43; RPMI medium, p *<* 0.011, *rs =* 0.54, Spearman's rank-order correlation). However, no significant correlations were observed between biofilm formation and clade designation, or between biofilm formation and other genetic or phenotypic traits (**Table S5**).

***Drug resistance***

Diverse genetic and cellular strategies are utilized by *C. albicans* to promote resistance to antifungal drugs. To assess drug sensitivity of the clinical isolates, we determined the minimum inhibitory concentrations (MICs) using Etest assays for five drugs belonging to four major classes of antifungals (**Figure S13**, **Table S7**). All strains were sensitive to amphotericin B and caspofungin, and produced MIC values less than the clinical breakpoints (0.38 μg/ml and 0.25 μg/ml, respectively) ([Park et al. 2006](#_ENREF_49); [Pfaller et al. 2011](#_ENREF_52)).

Six strains were resistant to flucytosine at ≥32 μg/ml, including five isolates belonging to clade I, consistent with reports of increased resistance to flucytosine among clade I isolates ([Dodgson et al. 2004](#_ENREF_14); [Pujol et al. 2004](#_ENREF_53)). We examined strains for amino acid changes in genes associated with flucytosine resistance: cytosine deaminase (*FCA1*), uracil phosphoribosyl transferase (*FUR1*), and two purine-cytosine permeases (*FCY2* and *FCY22*). In the five clade I flucytosine resistant isolates, we identified an arginine to cytosine substitution at position 101 of Fur1(**Table S8**), a mutation previously shown to be associated with flucytosine resistance in clade I isolates ([Dodgson et al. 2004](#_ENREF_14); [Hope et al. 2004](#_ENREF_26); [Pujol et al. 2004](#_ENREF_53)). This change was homozygous in one strain, 19F, although we were unable to determine if this further increased drug resistance as multiple strains were already resistant to the maximum drug concentration. Strain P37039 (clade I, closely related to 19F and L26) and strain P94015 (clade I, distantly related to all other clade I strains) showed intermediate and high resistance to flucytosine, respectively, but neither strain contained the R101C mutation in Fur1. In addition, the amino acid substitutions in *FCA1*, *FCY2*, and *FCY22* present in these isolates have not been previously associated with drug resistance, and were present in both drug resistant and drug sensitive strains.

Resistance to the triazole drugs, fluconazole and voriconazole was observed in two strains. P94015 and P60002 showed high resistance to fluconazole (MIC ≥256 μg/ml) and intermediate resistance to voriconazole (**Figure S13, Table S7**), while all other strains were susceptible to these drugs (MIC < 3 μg/ml). *C. albicans* utilizes at least three mechanisms for generating resistance to azoles ([Cowen 2008](#_ENREF_12)). First, resistance can arise due to alterations in the target protein, Erg11, either due to overexpression of this protein or due to point mutations that limit drug function. Second, genes encoding drug transporters (including *CDR1, CDR2,* and *MDR1*) can be upregulated. Third, alterations in the ergosterol biosynthetic pathway can reduce drug toxicity by preventing accumulation of a toxic sterol that forms when Erg11 function is inhibited. The P94015 isolate was homozygous for two mutations in *ERG11* encoding the azole target; F126L, which was previously reported in azole resistant isolates ([Perea et al. 2001](#_ENREF_51)), and R467K, which was demonstrated to reduce the affinity of fluconazole for Erg11 ([Lamb et al. 2000](#_ENREF_32)) (**Table S9**). In contrast, validated Erg11 mutations mediating drug resistance were not found in P60002 (**Table S9**).

P94015 also contained a homozygous E461K mutation in the transcriptional regulator Tac1; this mutation was previously shown to drive hyperexpression of the azole efflux pumps *CDR1* and *CDR2* ([Sanglard et al. 1995](#_ENREF_58); [Sanglard et al. 1997](#_ENREF_57); [Coste et al. 2009](#_ENREF_11)). Consistent with the E461K mutation causing increased Tac1 activity, *CDR1* and *CDR2* genes were expressed at an elevated level in P94015 relative to control strains (**Table S10**). In contrast to P94015, genomic and transcriptional analysis did not reveal the mechanism of azole resistance in P60002. This isolate contained a truncated allele of Tac1 due to a Q837* mutation, removing the terminal 145 amino acids. However this allele is not expected to increase drug resistance, as *CDR1/CDR2* were not overexpressed in this strain (**Table S10**). The cause of resistance in P60002 likely involves an uncharacterized pathway, possibly involving increased expression of putative transporters encoded by *CDR11* and *QDR1* (**Table S10**).

***Analysis of aneuploid isolates***

Flow cytometry showed that all *C. albicans* strains were close to diploid in DNA content (see **Figure S7**). Frequent aneuploidy was observed including hemizygosity (P76067), segmental aneuploidy (P94015, P60002), and whole chromosome aneuploidy (12C, 19F, L26, P75010, P78042, P60002) (see **Figure 3** and **Figure S8**). Of the *C. albicans* isolates containing whole chromosome aneuploidies, an extra copy of chromosome 4 was common to 3 of the 6 strains. Trisomy for chromosome 4 was also common in *C. albicans* progeny resulting from the parasexual mating cycle ([Forche et al. 2008](#_ENREF_17)). Furthermore, passage of a strain through a mouse host resulted in acquisition of chromosome 4 trisomy ([Chen et al. 2004](#_ENREF_10)). This suggests that chromosome 4 trisomy is particularly well tolerated by this species and may have fitness advantages during growth in the host.

Segmental aneuploidies, detected as partial chromosome duplications, were less frequently observed than whole chromosome changes, but this form of copy number variation can still provide a selective advantage to *C. albicans*. For example, an isochromosome of the left arm of chromosome 5, termed (i5L), is common in fluconazole resistant strains, and the extra copies of *ERG11* and *TAC1* genes on this isochromosome result in increased drug resistance ([Selmecki et al. 2006](#_ENREF_59); [Selmecki et al. 2008](#_ENREF_60)). Interestingly, the two strains containing segmental aneuploidies, P94015 and P60002, were both resistant to azole drugs, suggesting that they may have been previously exposed to azole treatment. Although neither strain contained the i5L aneuploidy, fluconazole treatment of *C. albicans* has been shown to be associated with other types of aneuploid formation ([Selmecki et al. 2006](#_ENREF_59)), and it is therefore possible that the segmental aneuploidies in P94015 and P60002 are a direct consequence of prior drug exposure.

***Telomere analysis of C. albicans isolates***

Sequencing of *C. albicans* strain SC5314 previously identified the telomere-associated (*TLO*) gene family at subtelomeric regions ([Butler et al. 2009](#_ENREF_7)). Unique gene structure among *TLO* family members defines three clades (, , and ) that have distinct transcriptional profiles and localization patterns ([Anderson et al. 2012](#_ENREF_2)). The *TLO* gene family is of interest as this family is greatly expanded in *C. albicans* compared to related species; the previously sequenced SC5314 isolate encoded 14 *TLO* genes compared to two *TLO* genes in *Candida dubliniensis* and only one *TLO* gene in other *Candida* clade species ([Butler et al. 2009](#_ENREF_7)).

To determine the composition of genes at *C. albicans* subtelomeres, these regions were PCR amplified using primers within sequence-specific regions for each chromosome arm and the resulting amplicons sequenced. Sequencing identified members of the *TLO* gene family at most chromosome ends in all 21 isolates. The total number of *TLO*s varied from 10 to 15 between isolates (see **Table S12**), with twelve to fourteen of the sixteen chromosome arms containing a *TLO* in each strain. As in SC5314, a single *TLO* member was found in each of the 21 clinical isolates, whereas the number of *TLO* and *TLO* genes fluctuated considerably (**Figure S4A**, **Table S12**). Two chromosome arms, Chr 6R and 7L, lacked a terminal *TLO* gene in all isolates, while chromosome arms RR and 7R encoded *TLO*2 and *TLO*16, respectively, in all isolates (**Figure S4A**). In the SC5314 isolate sequenced in this study, the right arm of Chr 4 encoded either *TLO*9 or *TLO*10 on each homolog (**Figure S4B**)**,** indicating that different *TLO* genes can reside on different chromosomal homologs. Analysis of three additional SC5314 isolates originating from various sources confirmed this configuration of *TLO*9 and *TLO*10 on Chr 4R.

Our results establish that *C. albicans* *TLO* genes are undergoing rapid evolution, with different combinations of genes present in different isolates. Genes at telomeres tend to expand and diversify when they confer a selective advantage based on the conditions required for survival ([Kyes et al. 2007](#_ENREF_31); [Carreto et al. 2008](#_ENREF_8)), and it is tempting to speculate that similar advantages may be conferred by the *TLO* gene family in *C. albicans*.

**Substitution Rates and Evolutionary Selection in Clinical Isolates**

Comparing the ratio of nonsynonymous changes (*d*N) to synonymous changes (*d*S) can highlight genes under selective pressure, including those involved in host interactions or that respond to other environmental factors. To examine which *C. albicans* genes showed the most extreme diversifying or purifying selection, we calculated the *d*N/*d*S ratio (omega value) for each gene across all 21 isolates (see Methods). The mean and median value of omega for all genes was 0.12, suggesting that most genes are under purifying selection; furthermore, the vast majority of genes, a total of 5,378, exhibited an omega value equal to or below 0.5 (**Table S14**). The most evolutionarily constrained genes were enriched for GO Slim categories for ribosomal biogenesis (p < 0.02, hypergeometric test), and generation of precursors of metabolites and energy (p < 0.028), and translation (p < 1.5 e-10).

***Predicted loss of function in coding regions***

Loss-of-function mutations in protein-coding genes can provide insights into selective pressures on functional processes among isolates. Nonsense mutations truncated 175 genes and indels resulted in frameshift mutations that disrupted 391 genes, with many of these mutations shared by multiple strains (**Tables S15, S16**). Nonsense mutations and indels targeted the same loci in many cases (**Figure S6**; p < 2x10-16,2), suggesting strong evolutionary pressure on these loci. The presence of independent indels disrupting the same gene in distinct strain subsets further supports convergent evolutionary mechanisms operating on the same locus. In total, 512 genes, or roughly 8% of the protein-coding genes in *C. albicans* reference genome, were disrupted among this set of isolates. In some cases, genes were disrupted in all isolates including the resequenced SC5314 reference strain, suggesting variation between SC5314 isolates or a problem in the original genome assembly. The majority of all disrupted ORFs were not functionally annotated, which is consistent with only ~25% of *C. albicans* ORFs having a described function (Arnaud et al, 2009.). Gene ontology (GO) enrichment was not found for disrupted genes even after removing hypothetical and predicted ORFs, potentially due to the presence of multiple independent selective pressures having acted on different isolates. In the case of the P94015 isolate which showed several unusual phenotypes, genes with homozygous nonsense mutations were further evaluated as candidates for the responsible phenotypic change (see below).

By examining the distribution of the disrupted genes in the genome, we found that they are enriched near transposable elements. Mutationally enriched and depleted regions in the genome were identified based on increased density of these events in sliding windows; these regions do not necessarily coincide between the two mutation types (**Figure S6**). We further tested if the positions of nonsense mutations or indels correlated with the positions of transposable elements across the genome. A strong correlation was observed between the positions of transposable elements and disrupting indels (W(220), 3.64x10-20, Wilcoxon rank sum test), but much less between transposons and nonsense mutations (W(220), 2.685x10-5, Wilcoxon rank sum test). This pattern is consistent with prior work that found indel-dense regions of the genome are enriched for repetitive sequences (Muzzey et al. 2013). The distribution of mutated genes therefore reveals that genes mutated by indels are significantly more common near repetitive elements.

***Loss of EFG1 function in P94105 and phenotypic analysis***

Isolate P94015 was of particular interest given its low virulence in models of infection, and also the fact that the morphology of P94105 cells was unusual, being intermediate to that of conventional white or opaque cells (see Main Text and **Figure S9**). To further address the phenotypic state of P94015, transcriptional profiling was performed on P94015 cells and the profile compared to that previously described in white and opaque cells ([Tuch et al. 2010](#_ENREF_69)).

The expression profile of P94015 showed that a number of ‘opaque-specific’ genes were significantly upregulated in P94015 (FDR<0.05, log fold change>2). Of the 121 genes upregulated in P94015 relative to control white strains (**Table S18**), 36 (30%) were previously characterized as being upregulated in opaque cells ([Hernday et al. 2013](#_ENREF_23)) . The correlation of the log fold change for differentially expressed genes in P94105 and opaque cells, each compared to control white cells, was significant (Spearman’s rho = 0.21, p < 2.2 e-11). Interestingly, however, the expression of several transcriptional regulators that promote the opaque state including Wor1, Wor2, Wor3, and Czf1, ([Zordan et al. 2007](#_ENREF_72)) was not upregulated in P94015 as in opaque cells (**Figure S10**). Thus, although the profile of P94015 cells shows a significant overlap with opaque cells, regulators expected to upregulated in opaque cells are not upregulated in P94015.

Recent studies have revealed the existence of additional heritable states related to those of white and opaque. These include a ‘gray’ phenotypic state that is present in cells undergoing switching between white, opaque, and grey forms ([Tao et al. 2014](#_ENREF_67)), and a ‘GUT’ phenotypic state that results in increased fitness in the gastrointestinal tract ([Pande et al. 2013](#_ENREF_48)). Interestingly, the correlation between differentially expressed genes in the gray and GUT states was significant, when each was compared to cells in the white phenotypic state, (Spearman’s rho = 0.30, p < 2.2e-16, see **Figure S10**). The expression profile for P94105 similarly showed a correlation with the profiles of gray cells (Spearman’s rho = 0.29, p-value 2.2e-16) and GUT cells (rho = 0.25, p ,< 1.2e-15) relative to white cells, but also significant differences with each of these profiles (**Figure S10**). Thus, in agreement with cellular morphology, expression profiling indicates that P94015 exhibits an unusual phenotype with both white- and opaque-like transcriptional features, and that overlaps with, but is distinct from, the recently described gray and GUT phenotypic states.

Isolate P94015 was found to encode intact copies of Wor1, Wor2, Wor3, Czf1, and Ahr1, but contained a premature stop mutation in the gene encoding Efg1. Previous studies showed that loss of Efg1 alters the phenotypic state, blocks the formation of hyphae in response to most environmental cues, and decreases virulence in models of oral and systemic infection ([Lo et al. 1997](#_ENREF_40); [Stoldt et al. 1997](#_ENREF_64); [Sonneborn et al. 1999](#_ENREF_62); [Braun and Johnson 2000](#_ENREF_6); [Srikantha et al. 2000](#_ENREF_63); [Korting et al. 2003](#_ENREF_29); [Zordan et al. 2007](#_ENREF_72); [Noffz et al. 2008](#_ENREF_46)). We demonstrate here that a nonsense mutation in *EFG1* is similarly responsible for many of the novel properties of P94015 including: (1) an altered phenotypic state, (2) an inability to filament, (3) reduced virulence in a systemic model of infection, and (4) increased fitness in a model of commensal growth. Restoration of full-length *EFG1* into P94015 also increased the growth rate in YPD medium and enhanced the *in vitro* fitness of this isolate relative to the parental strain (**Figure S12E** and **F**). This indicates that loss of *EFG1* is associated with a general fitness defect under replete growth conditions.

**Supplementary Methods**

***C. albicans* strains, plasmids and media**

The construction of the *pWh11-GFP* plasmid (pRB169) has been previously described ([Si et al. 2013](#_ENREF_61)). The *pOP4-GFP* plasmid (pRB168) was made by fusion PCR amplification of the *OP4* promoter from *C. albicans* and *GFP* from pADH76a ([Hernday et al. 2010](#_ENREF_24)). The PCR product was cloned into pSFS2A ([Reuss et al. 2004](#_ENREF_55)) between *Apa*I and *Xho*I. pRB168 and pRB169 were linearized with *Bsg*I and *Aat*II, respectively, prior to transformation. For the SC5314 strain background, constructs were transformed into RBY1173 to create strains CAY3070 (SC5314-*pWH11-GFP*) and CAY3068 (SC5314-*pOP4-GFP*), respectively. For the P94015 strain background, pRB169 and pRB168 were transformed into CAY710 to create strains CAY3968 (P94015-*pWH11-*GFP) and CAY4497 (P94015-*pOP4-GFP*), respectively.

The construction of the *EFG1-*complementation plasmid, pRB327, was performed by PCR amplification of *EFG1* and promoter and cloning between *Apa*I and *Kpn*I sites in pSFS2A. This plasmid was linearized with *Hpa*Iand integrated into the endogenous *EFG1* locus in P94015 to create strains CAY4458 and CAY4499 (P94015-*EFG1*(1) and P94015-*EFG1*(2), respectively). pRB327 also was transformed into the endogenous locus of SC5314 *efg1*Δ/*efg1*Δ (CAY2163) strain to create CAY4453 (*efg1*Δ/*efg1*Δ::*EFG1*). To reconstruct the truncated *EFG1* allele from P94015, *efg1STOP* was generated by site-directed mutagenesis using SC5314 *EFG1* as a template. The 5’ part of the gene was amplified by PCR using oligos CGGCCGGGTACCATTGCCCTACCCATCTACTCGC and GTTGTTGTTGTCCTGCTGTCT**A**TCCAGTCTGTTGACCTGG while the 3’ part of the gene was PCR amplified with oligos GGCCGCGGGCCCTGTCAATGGATTTGGGAGAAG and CCAGGTCAACAGACTGGA**T**AGACAGCAGGACAACAACAAC). Fusion PCR was used to combine the 5’ and 3’ PCR products. The *efg1STOP* allele was cloned between *Apa*I and *Kpn*I in pRB326 ([Si et al. 2013](#_ENREF_61)) to create plasmid pRB402. This plasmid was linearized with *Hpa*I and transformed into the endogenous *EFG1* locus of RBY717 (*EFG1/EFG1)* and CAY2163 (*efg1*Δ/*efg1*Δ) to create CAY4407 (*EFG1/EFG1::efg1STOP)* and CAY4409 (*efg1*Δ/*efg1*Δ:: *efg1STOP)* respectively.

**Virulence score**

Virulence scores for each clinical isolate were calculated from previously generated survival curves of *C. albicans* systemic infections in mice ([Wu et al. 2007](#_ENREF_70)) using two different metrics. First, the slope of the survival curve was measured using a line generated between *t*start and *t*end, where *t*=time (days).  *tend* was either the point when all mice were deceased, or when the experiment was terminated.  A second quantitative virulence score was measured using the time to kill 50% of the infected mice (LDt50). For both virulence metrics, if two survival curves were performed, the virulence scores reported were the average of the two measurements. The calculated virulence scores are provided in **Table S1**.

**Growth Rates**

Strain doubling times were determined from growth curves generated in a Biotek Synergy HT plate reader/incubator. *C. albicans* cells were grown overnight in YPD at 30°C. The following day, cells were washed once in sterile water and then diluted to a final concentration of ~0.1 OD600 in 450 µl test media in 48-well plates. Plates were shaken continuously and OD600 readings recorded every 15 minutes for 18 hours. Doubling times were calculated from OD600 readings using a custom MATLAB script (Darren Abbey, U. Minnesota). The reported doubling times are the averages of three biological replicates per condition (with 2-3 technical replicates performed per biological replicate).

**Stress Resistance**

Cells were grown overnight at 30°C in YPD, quantified by OD600 and diluted to ~0.1 OD sterile water. Serial dilutions (1:10) were made in sterile water, and 5 µl of each dilution spotted onto agar plates. Test media were SCD + stressor and incubated at 30°C with the exception of the 42°C (elevated temperature stress) plate. For quantitative measurements of stress sensitivity for use in correlation analyses, 4 ten-fold dilutions of cells from the spot assays were analyzed. Strain stress sensitivity was then scored from 0-4 (0 being no growth, and 4 being cell growth on all dilutions).

**Biofilms**

Biofilm experiments were performed by measuring the total change in biomass of *Candida* cells grown on the surface of silicone squares (Bentec Medical, #PR-72034-06N) incubated in liquid Spider medium at 37°C using a previously described procedure ([Nobile et al. 2012](#_ENREF_43)). Silicone squares were weighed to determine their initial weight and incubated overnight at 37°C in 2 ml adult bovine serum (Sigma-Aldrich, B-9433). Squares were washed in 2 ml phosphate-buffered saline (PBS), and submerged in 2 ml Spider medium in 12-well plates (Costar). To prepare *C. albicans* cells, each strain was grown overnight in YPD at 30°C. The cell density of the overnight cultures was measured by OD600, and cells diluted to a final OD600 of 0.5 in each well. Cells were incubated shaking at 150 RPM at 37°C for 90 minutes to allow for cells to adhere to the silicone surface. Next, silicone squares were washed with 2 ml of PBS and transferred to 2 ml fresh Spider medium. Plates were incubated for 48-60 hours at 37°C. Plates were imaged and media removed. Silicone squares were allowed to air dry for 24 hours, and then re-weighed to calculate the final change in biomass.

**Antifungal Drug Resistance**

To measure minimum inhibitory concentrations (MICs) of antifungal drugs, *C. albicans* cells were grown on agar containing Etest strips (bioMérieux). *C. albicans* cells were prepared by overnight growth in YPD at 30°C. Cell density of overnight cultures was measured by OD600 readings and ~40,000 cells were spread onto casitone agar plates. The cell inoculum was allowed to dry for ~20 minutes, and the Etest strips applied to the center of the plate. All Etest experiments were incubated at 37°C and read after 48 hours of growth.

**Filamentation Assays**

Filamentation scores were measured by analyzing colony morphologies on solid Spider agar (modified M-score)([Noble et al. 2010](#_ENREF_45)).  Strains were grown overnight in liquid YPD at 30°C, diluted in sterile water, and ~50-100 CFUs plated onto solid Spider agar and incubated at 30°C and 37°C for 7 days.  Colony filamentation was then quantified by determining the percentage of colonies exhibiting peripheral filamentation (0-100) and the degree of filamentation (0-100).  The total filamentation score was determined by the following equation: (% Colony Filamentation * Degree of Filamentation)/100.

            Prior to filamentation assays in RPMI, cells were grown overnight in 3 ml liquid YPD at 30°C.  The following day, cells were diluted to ~0.2 OD600 in 3 ml fresh RPMI Medium 1640 (Gibco) and incubated at 37°C for ~6 hours.  Cells were analyzed by microscopy and the % of filamentous cells was determined by analysis of ~400 cells per strain. Filamentation assays by serum induction were performed by diluting overnight cultures grown in liquid YPD at 30°C into pre-warmed, 37°C YPD medium supplemented with 10% fetal bovine serum to a final concentration of ~0.2 OD600. Cultures were incubated for 90 minutes at 37°C with agitation, and filamentation examined by microscopy.

***Galleria* *mellonella* infections**

*G. mellonella* infections were carried out using previously described protocols ([Fuchs et al. 2010](#_ENREF_18)).  In brief, *C. albicans* cells were prepared forinfections by growth overnight in YPD medium at 30°C.  Overnight cultures were washed 3 times in 5 ml sterile PBS.  Cell density was quantified using OD600 measurements with a NanoDrop 2000c Spectrophotometer (Thermo Scientific).  Cell suspensions (~2.5x105 CFUs for analysis of the full set of clinical isolates and~5x105 CFUs for analysis of P94015 vs. P94015+*EFG1*) in a 10 μl volume of sterile PBS were injected into the terminal pro-leg of *G. mellonella* larvae (Vanderhorst Wholesale, [www.snackworms.com](http://www.snackworms.com/)) using a 26 G, 10 μl syringe (Hamilton, No.80300) (n=30 larvae per strain).  Dilutions of cell suspensions were plated onto YPD agar and CFUs counted to confirm inoculum.  After infection, *G. mellonella* larvae were incubated at 37°C for 10 days.  *G. mellonella* larvae were scored daily for signs of death (immobility and darkened pigmentation).  The Log-rank (Mantel-Cox) test was used for statistical analysis of survival curves.

**DNA staining and flow cytometry**

Cytometric analysis of cells was performed as described previously ([Hull et al. 2000](#_ENREF_27)).  Cells were grown overnight in YPD at 30°C and diluted in YPD to an OD600 of ~0.2.  Cell cultures were incubated at 30°C until cell density reached an OD600 ~1.5.  500 μl of cell culture was fixed by addition of 1.1 ml 100% ethanol and incubated at 4°C overnight.  Cells were washed twice in 250 μl Buffer A (50 mM Tris-HCl, pH 8.0, 5 mM EDTA), followed by sonication at low power.  Next, cells were resuspended in 500 μl of 2 mg/ml RNase A solution in Buffer A, and incubated at 37°C for 2 h.  Cells were pelleted, resuspended in 250 μl 5 mg/ml pepsin in 55 mM HCl, and incubated at 37°C for 45 min.  Cells were washed with 250 μl Buffer B (50 mM Tris-HCl, pH 7.5, 5 mM EDTA), sonicated at low power, and resuspended in 250 μl Buffer B.  50 μl of each sample was stained with 500 μl of 1 μM Sytox Green and incubated at 4°C overnight.  A total of 10,000 cells from each sample were run on a MACSQuant Analyzer 10 (Miltenyi Biotech) and data analyzed using FlowJo (Tree Star Inc.).

For cytometric analysis of white and opaque GFP reporters, cells were grown overnight in liquid YPD at 30°C. Overnight cultures were washed in PBS and live cells were analyzed using a BD FACSAria. ~500,000 GFP expressing cells were sorted and subcultured in YPD at 30°C for 5 hours. Cells were then washed in PBS and ~100,000 cells from pure populations of live GFP expressing cells were reanalyzed on a BD FACSAria. All FACS data was processed and analyzed using FlowJo (Tree Star Inc.)

**Light Microscopy**

Differential interference contrast (DIC) and fluorescence microscopy of cells were performed using a Zeiss Inverted Microscope (Axio Observer. Z1) fitted with an AxioCam HR.  Images were processed with AxioVision Rel. 4.8 (Zeiss, Germany) and Adobe Photoshop CS5.

**Scanning electron microscopy**

*C. albicans* P94015 cells were grown on YPD at 30°C. Cells were resuspended in water and attached to poly-L-lysine coated-coverslips. Cells were fixed with 2.5% (w/v) glutaraldehyde in 0.1 M Na-cacodylate buffer, pH 7.4, at 4°C, and washed with 0.1 M Na-cacodylate buffer, pH 7.4. The cells were postfixed with 1% aqueous osmium tetroxide in 0.1 M Na-cacodylate buffer, pH 7.4, at 25°C for 90 minutes, and washed with 0.1 M Na-cacodylate buffer, pH 7.4. Following fixation, cells were dehydrated gradually using a gradient ethanol series and subsequently dried in a critical point dryer. The samples were then coated with 20nm of gold palladium (60:40) in an Emitech K550 sputter coater. Cells were imaged with a Hitachi S-2700 scanning electronic microscopy and collected with Quartz PCI software.

**Whole genome sequencing and variant identification**

Two WGS libraries were constructed for Illumina paired-end sequencing. For the fragment library, 100 ng of genomic DNA was sheared to ~250 bp using a Covaris LE instrument and prepared for sequencing as previously described ([Fisher et al. 2011](#_ENREF_16)). The 2.5 kb jumping library was prepared using the 2-to5-kb insert Illumina Mate-pair library prep kit (V2; Illumina) as previously described ([Grad et al. 2012](#_ENREF_21)). BWA 0.5.9 ([Li and Durbin 2010](#_ENREF_36)) read alignments were filtered requiring a mapping quality of 30 using SAMtools view ([Li et al. 2009](#_ENREF_37)). To minimize false positive SNP calls near insertion/deletion (indel) events, poorly aligning regions were identified and realigned using GATK RealignerTargetCreator and IndelRealigner (GATK version 1.4-14) ([McKenna et al. 2010](#_ENREF_42)). SNPs were identified using the GATK UnifiedGenotyper, and filtered using the GATK VariantFiltration using the version 3 best practices for hard filters (QD<2.0, MQ<40.0, FS>60.0, HaplotypeScore > (average value + 2*standard deviation), MQRankSum<-12.5, ReadPosRankSum<-8.0). This method predicted between 62,062 and 121,071 SNPs per strain, with an average transition to transversion ratio of 2.50. Clade I strains contain an average of 4.8 SNPs/kb and other strains nearly twice this level (8.2 SNPs/kb). This difference is due to a 4-fold higher rate of fixed homozygous variants in the other clades and reflects the use of a clade I strain (SC5314) as a reference for SNP calling. The average nucleotide diversity across the sequenced isolates was computed as the average of pairwise differences between all pairs of strains, normalized to callable bases (SNPs and positions matching the reference). Positions that matched the reference base in each strain were computed by emitting all sites with GATK, selecting matching reference positions, and requiring a mapping quality of 30 and minimum depth of 8 at these positions.

To examine the pattern of polymorphisms across the genome, the SNP density of either heterozygous or homozygous positions was calculated for 5 kb windows and plotted across the genome. Windows were merged to characterize regions of the genome as homozygous or heterozygous as follows. First, homozygous regions also found in the SC5314 reference strain were identified; strains that shared homozygous regions with SC5314 were mostly found in clade I stains. Adjacent windows without SNP calls were merged into homozygous regions, allowing no more than one intervening window with low SNP frequency (regions without SNPs marked blue in Figures 4 and 5). Next, adjacent windows with a high frequency of homozygous SNPs (>0.4 SNPs per kb) were merged, also allowing at most one intervening window; these regions have undergone loss of heterozygosity and differ from the allele combination present in SC5314 (regions with SNPs marked blue in **Figures 4 and 5**). The remaining regions of the genome had heterozygous SNPs present. The borders between homozygous and heterozygous regions were manually reviewed.

To visually examine ploidy variation across the genome, the Illumina read alignment depth was calculated for 5 kb windows across the genome, using the GATK Depth of Coverage module. Read depth was normalized to the average depth in each strain and for GC content, as this can influence both the sequencing chemistry and the alignment quality ([Risso et al. 2011](#_ENREF_56)). The GC percentage was calculated for each 5 kb window of the genome and used to bin windows by their GC content. The average alignment depth was then calculated for each GC bin. The alignment depth for each individual 5 kb window was normalized to the corresponding GC bin average.  From these plots, large scale ploidy variation (whole chromosome and large segmental duplications) was identified using CNVnator v.0.2.2 ([Abyzov et al. 2011](#_ENREF_1)), with a 100 base bin as the threshold to partition the genome, and requiring identified regions were at least 1 kb in length.

For structural variants, potential inversions and translocations identified from the de novo assemblies were validated by evaluating read support using BreakDancer ([Chen et al. 2009](#_ENREF_9)). Genome assemblies were aligned to the SC5314 v21 reference using NUCmer (version 3.22) ([Kurtz et al. 2004](#_ENREF_30)) with the parameter –maxmatch; alignments were filtered using delta-filter requiring 1-to-1 alignments allowing for rearrangements (-1), identity of 99% and a minimal alignment length of 200 nucleotides. Potential inversions were identified based on these coordinates. Next, BreakDancer (v-1.1.2), was used to independently detect inversions using the jumping library paired-end reads aligned against the SC5314 reference assembly using BWA 0.5.9 ([Li and Durbin 2010](#_ENREF_36)). A configuration file for each of the isolates was generated using the BreakDancer compiled script bam2cfg.pl. Then inversions were identified from the aligned read files using the BreakDancer max command with the following options: -q (mapping quality) 40, -r (minimum number of read pairs required) 3, and -y (output score filter) 99. Coordinates corresponding to inversions were extracted and compared with to the NUCmer alignment coordinates. Of the 165 total inversions identified by NUCmer, a total of 51 (31%) had at least 50% overlap with regions identified by BreakDancer.

**Phylogenetic analysis of SNPs and MLST loci**

The phylogenetic relationship of the strains was evaluated using the whole genome SNP calls; a total of 113,336 parsimony informative positions were included. A distance based tree was estimated using maximum parsimony with PAUP* (4.0) ([Swofford 2002](#_ENREF_66)); a step matrix was used to estimate the distance between homozygous and heterozygous positions, where each of the homozygotes are two steps apart from each other and one step from the heterozygote. SNP positions were resampled using 1,000 bootstrap replicates, and the phylogeny re-estimated to test the branch support.

For MLST analysis, alleles of the seven loci (*AAT1a, ACC1, ADP1, MPIb, SYA1, VPS13*, and *ZWF1b*) were identified in each strain. The genes were identified from *de novo* assemblies of each strain (see below) and clipped based on boundaries previously defined by primer locations ([Tavanti et al. 2003](#_ENREF_68)). Next, SNPs identified with GATK were introduced into each locus for each strain as degenerate bases. The loci were compared to previously defined allele and sequence types using <http://calbicans.mlst.net/>. The SC5314 strain in our data set showed an exact match to that in this database. A diploid sequence type was assigned to each strain based on an exact or closest match.

To anchor our strains into the clades identified by MLST analysis, we reduced the MLST data set of 1,391 strains. The complete data set was clustered using cd-hit ([Li and Godzik 2006](#_ENREF_39)) requiring 90% identity for clusters; this resulted in 69 representative sequences. We then combined the loci of our 21 strains with this set; each base was rewritten twice to provide the two alleles at any position (same base for homozygous and the two different bases for a heterozygote). Using MEGA5, we utilized p-distance to construct a dendrogram and used a p-distance cutoff of 0.04 to define clades as previously described ([Odds et al. 2007](#_ENREF_47)).

**Assembly and annotation**

The Illumina reads for each strain were assembled using ALLPATHS-LG ([Gnerre et al. 2011](#_ENREF_19)) with the parameters HAPLOIDIFY=True and ASSISTED_PATCHING=1; the chromosomal assembly of SC5314 (version A21-s02-m01-r01) was used as a reference. In initial assemblies, the aneuploid chromosomes present in a subset of strains did not assemble as well as the diploid chromosomes. To address this, we incorporated the haploidify parameter of ALLPATHS, developed to address assembly of heterozygous regions. Haploidify identifies regions of the assembly graph representing the two haplotypes (bubbles in graph with haploid:diploid copy number), and resolves these regions by choosing one haplotype branch and replacing the k-mers on non-selected branch with those on the selected branch. This simplifies the graph and allows for increased connectivity on both the contig and scaffold levels. For *C. albicans*, haploidify increased the continuity of both metrics; in an assembly of SC5314 Illumina data, the contig N50 increased by 3.7-fold and the scaffold N50 increased by 7.0-fold. The version of the SC5314 Illumina assembly used as a control in analysis of assembly continuity and completeness also included paired-end reads from a 40 kb insert Fosill library ([Gnerre et al. 2011](#_ENREF_19)); this library type was only constructed for SC5314.

Genes were predicted for each strain by mapping the gene set from SC5314 reference genome and identifying novel genes using the *ab initio* gene prediction program Prodigal ([Hyatt et al. 2010](#_ENREF_28)). To map genes, the SC5314 reference genome was aligned to the assemblies of other strains with NUCmer, and the longest unique alignment covering any region selected. Genes were then transferred from SC5314 to the target assembly using the alignment coordinates. In cases where alignment based mapping resulted in a gene with internal frameshifts, the longest ORF predicted by a perl script or a transcript predicted by Prodigal was substituted if longer than the mapped gene. For genes not mapped by this method, blast alignments were used to identify missing loci and gene structures were added using Prodigal and GeneWise ([Birney et al. 2004](#_ENREF_5)). In some cases a single gene mapped to two loci in an assembly; these were flagged as duplicate mappings, some of which represent separately assembled alleles of high diversity. RNA-seq reads generated for SC5314 were then used to evaluate gene structures; reads were aligned to the SC5314 genome using the inchworm component of the Trinity pipeline ([Grabherr et al. 2011](#_ENREF_20)). These alignments were then input to PASA ([Haas et al. 2008](#_ENREF_22)) to create ORFs on the reference genome; this supported the modification of only two reference genes (moved the start codons of both CDR3/orf19.1313 and OPT5/orf19.176 further upstream), these modifications were corroborated by better representing protein domains in each protein identified by PFAM. Genes with similarity to repetitive elements (identified using TransposonPSI, http://transposonpsi.sourceforge.net/) and an in-house curated database of repetitive sequence, or with repetitive element PFAM domains, were removed from the gene sets. Orthologs were mapped across the gene sets using OrthoMCL ([Li et al. 2003](#_ENREF_38)).

**Variants affecting coding regions**

Genes from the de novo assemblies were aligned to each other for each SC5314 reference gene with MUSCLE ([Edgar 2004](#_ENREF_15)), excluding any gene that differed in length by more than 20% from the SC5314 reference gene. In total, genes were 5,959 analyzed, covering 97% of the genome. Synonymous and non-synonymous substitution rates were calculated with the codeml tool from the paml software package (version 4.7, ([Yang 1997](#_ENREF_71))). GO Slim enrichments were performed with the GO Slim association files downloaded from the *Candida* Genome Database (http://www.candidagenome.org/), and the p-values were computed with the standard hypergeometric functions found in R ([RCoreTeam 2014](#_ENREF_54)). Candidate loss-of-function mutations due to premature stop codons in coding regions were curated by combining data from homozygous SNPs resulting in nonsense mutations (annotated using vcfannotator, vcfannotator.sourceforge.net) and indels.

**Telomere Analysis**

DNA from the sequenced strains was isolated as previously described ([Hoffman and Winston 1987](#_ENREF_25)). PCR of chromosome subtelomeres was performed using arm-specific primers with a pan-*TLO* primer ([Anderson et al. 2012](#_ENREF_2)). Amplicons were sequenced and the clade designation of all identified *TLO* genes was assigned based on previously described criteria ([Anderson et al. 2012](#_ENREF_2)). Chromosome arms were defined as lacking a *TLO* if they failed to produce a PCR product after three repeated attempts.

**RNA extraction, sequencing, and differential expression analysis**

To prepare *C. albicans* for RNA isolations, cells were first grown overnight in 3 ml YPD at 30°C on a roller drum. The next day, cells were diluted to OD600=0.2 in 5 ml fresh YPD and incubated at 30°C on a roller drum for 4 hours until the final OD600≈1.0. 1 ml of log-phase cells were pelleted and immediately frozen in liquid nitrogen. RNA was extracted using the RiboPure Yeast Kit (Ambion, AM1926) and samples were DNase treated with Turbo DNase (Ambion, AM2238). Following RNA purification, RNA quality was measured on an Agilent 2100 Bioanalyzer at the Brown University Genomics Core Facility, and RNA with RIN scores ≥7 used for RNA-seq.

PolyA RNA was isolated and use to construct strand-specific libraries using the dUTP second strand marking method ([Parkhomchuk et al. 2009](#_ENREF_50); [Levin et al. 2010](#_ENREF_34)) as previously described ([Cuomo et al. 2012](#_ENREF_13)). Samples were pooled and sequenced on the Illumina HiSeq to generate 101 base reads. To measure gene expression, reads were aligned to transcripts from the SC5314 genome. Since UTRs are not included in the available gene set, we added 100 bases of flanking regions on each side to the transcripts. RNA-seq reads were then mapped to the transcripts with Bowtie (version 0.12.9) ([Langmead et al. 2009](#_ENREF_33)), and placement of multiply mapped reads was estimated using RSEM (version 1.1.18) ([Li and Dewey 2011](#_ENREF_35)).

**Murine competition experiments**

To prepare *C. albicans* for systemic infection, cells were grown overnight in liquid YPD medium at 30°C.  On the day of infection, cells were diluted to an OD600 of 0.2 into 10 ml of fresh YPD medium and incubated at 30°C for 4 hours.  Cells were washed three times with sterile PBS and cell densities determined using OD600 measurements.  Mice were infected with a 1:1 mixture of two strains: wildtype P94015 (NAT-sensitive) and one of two independent P94015+*EFG1* (NAT-resistant) isolates, with a total inoculum of ~ 6.0 x 105 colony forming units (CFUs).  Each competition mixture was injected systemically into the lateral tail veins of 4 female BALB/c mice (~18 grams; ~8 weeks old; Charles River Laboratories.)  Dilutions of the inoculum were plated onto YPD and YPD+NAT to confirm the inoculum.  Mice were euthanized 7 days post-infection, and kidneys were homogenized and filtered through 0.7 μm cell strainers.  Dilutions of each kidney homogenate were plated in duplicate onto YPD and YPD+NAT.  CFUs for individual strains were determined by subtracting the number of CFUs observed on YPD+NAT agar from the total number of CFUs observed on YPD agar.

For *in vivo* commensal experiments, an antibiotic treated murine model of commensalism was used ([Pande et al. 2013](#_ENREF_48)).  To remove native gastrointestinal microbiota, mice were given antibiotics in their drinking water (1500 units/ml penicillin, 2 mg/ml streptomycin, and supplemented with 5% glucose for taste), starting 4 days prior to infection.  Mice remained on antibiotics for the duration of the infection.  To prepare *C. albicans* cells for infection, strains were grown overnight in 3 ml YPD at 30°C and washed 3 times in 5 ml sterile water.  Cell density (OD600) was quantified and  ~1x108 total CFUs of *C. albicans* (containing a 1:1 ratio of each competing strain) were introduced into the mouse GI tract directly by oral gavage with 20G x 38 mm plastic feeding tubes (Instech Laboratories, Inc.).Dilutions of the cell suspensions were plated onto agar to confirm the inoculum.  For each competition mixture, one strain was NAT sensitiveand one strain was NAT resistant.  Abundance of each strain was quantified by plating samples onto both YPD and YPD supplemented with nourseothricin (200 µg/ml).  Fecal pellets were collected daily from each mouse for 14 days.  Pellets were homogenized in sterile PBS + antibiotics, and dilutions of fecal homogenates plated onto YPD and YPD+NAT to quantify CFUs for each competing strain.  After 14 days post infection, mice were euthanized and the stomach, small intestine, cecum, and colon removed.  Organs were weighed and homogenized in sterile PBS + antibiotics using a Tissuemiser homogenizer (Fisher Scientific).  Dilutions of tissue homogenates were plated onto YPD and YPD+NAT to determine the abundance of each *C. albicans* strain.

**Figure S1. Dendrogram of MLST loci for sequenced isolates and additional representative isolates.** Variant positions across the seven MLST loci were concatenated for sequenced isolates and 69 additional isolates; p-distances computed with MEGA were used to infer a UPGMA dendrogram. Based on previous MLST clade assignment methods, a p-distance of 0.04 (red dotted line) was evaluated for clade assignment. Evaluation of branch support using bootstrap replicates found that close relationships (within clades) are well supported, but support for the relative ordering of clades is low in MLST data.

**Figure S2. Evaluation of virulence in the *Galleria mellonella* model of infection**. *C. albicans* strains were injected into *G. mellonella* larvae and time to death determined (see Methods). Experiments were performed using 10 larvae per strain (in triplicate). An average of the 3 experiments is shown in bold. Strains showed low virulence (12C, P94015, and P87), intermediate virulence (GC75, P76067, P78042, P37037, P76055, P75016, P57055, L26, and P60002), or high virulence (19F, P57072, P37039, P75010, P37005, P75063, P34038, SC5314, and P78048). Virulence in the *G. mellonella* model correlated with that previously described in the murine model of systemic infection (see **Table S5**).

**Figure S3**. **Filamentation of clinical strains in RPMI medium**. Strains were grown in RPMI medium at 37°C for 6 hours and the percent filamentation determined by cell microscopy. Error bars are standard error of the mean (n=3 biological replicates), and the colors indicate strain clade designation (gray = clade SA, blue = clade III, yellow = clade II, green = clade E, red = clade I).

**Figure S4. *TLO* conservation among sequenced strains. (A)** Targeted Sanger sequencing of the *TLO* gene family provided a measure of conservation of gene position in the sequenced isolates. Plotting the frequency of *TLO* conservation at each chromosomal position versus SC5314 demonstrated significant variability in locus conservation across the genome. **(B)** Cartoon depicts the *TLO* organization for Chromosome 4 in SC5314. The left arm of both Chromosome 4 homologs encodes *TLO*9 and the right arm encodes *TLO9* on one homolog and *TLO10* on the other homolog.

**Figure S5. Distribution of evolutionary rates across the *C. albicans* chromosomes.** The average rates of omega (*d*N/*d*S, black), *d*S (red) and *d*N (green) are plotted across each chromosome in the genome, in sliding windows of 100 genes.

**Figure S6. Characterization of gene-disrupting mutation types.** (**A**) Genes disrupted by either homozygous nonsense SNPs or indels were identified among the 21 sequenced clinical isolates. Comparison of genes disrupted by either mutation type revealed significant overlap among genes disrupted by either mutational mechanism. (**B**) The distribution of nonsense SNPs or gene-disrupting indels were plotted on each of the 8 *C. albicans* chromosomes arranged horizontally. The number of disrupted genes was plotted (50 kb sliding window, 10 kb intervals) along all chromosomes end-to-end. The average number of mutated genes is plotted as a blue line and the 95% confidence interval as red lines.


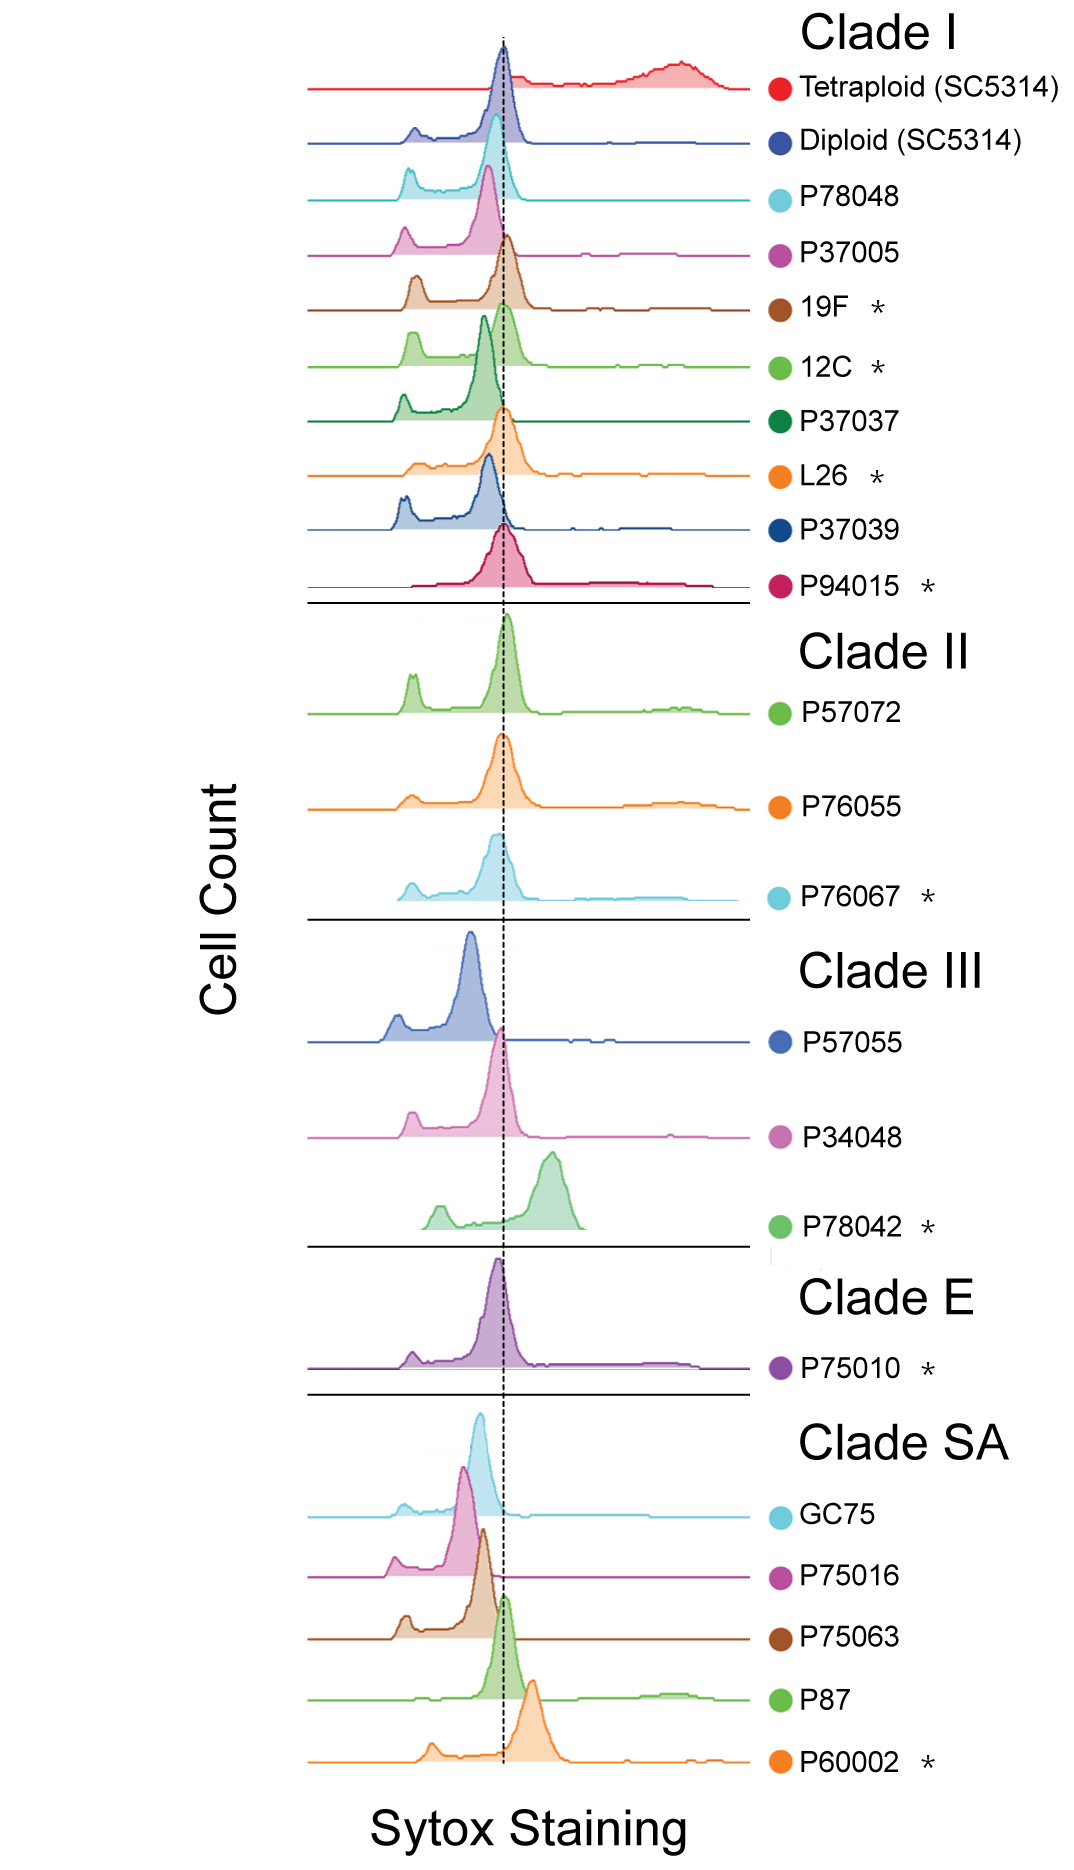


**Figure S7. Analysis of strain ploidy by flow cytometry.** To analyze overall DNA content in the clinical isolates, each strain was stained with Sytox Green and analyzed by flow cytometry (see Methods). Control diploid and tetraploid strains were from the SC5314 background. The vertical dotted line represents the DNA content of the G2 peak in the SC5314 diploid control. Aneuploid isolates are labeled with asterisks. Two strains carrying additional chromosomes (P78042 and P60002) showed increased ploidy consistent with the presence of supernumerary chromosomes.

**Figure S8. Chromosome ploidy changes in sequenced isolates.** Total read depth for each chromosome was normalized to an average of 2.0 (diploid) in each strain. The normalized depth is shown for each chromosome of each sequenced isolate, representing largely diploid levels, with some chromosomes present as triploid (3.0). Flow cytometry of strains was consistent with these changes in ploidy (**Figure S7**).

**Figure S9.** **Phenotypic analysis of isolate P94015**. (**A**) Scanning electron micrographs of P94015 cells and comparison with conventional white and opaque cells from the SC5314 strain background. (**B**)Fluorescence microscopy of cells expressing phase-specific reporters. Top, SC5314 white cells express *Wh11* and SC5314 opaque cells express *Op4*. Bottom, P94015 cells do not express *Wh11* and show lower expression of *Op4* than SC5314 opaque cells. (**C**) Flow cytometry of cells expressing white-(*Wh11-GFP*) or opaque-(*OP4-GFP*) specific reporters. Top panel shows flow cytometry plots of SC5314 white and opaque cells expressing *Wh11-GFP* and *Op4-GFP* reporters, respectively. The bottom panel shows white and opaque reporters in the P94015 strain background. The population of P94015 cells did not express *Wh11* and showed consistent, but low-level, expression of the *Op4* gene.

**
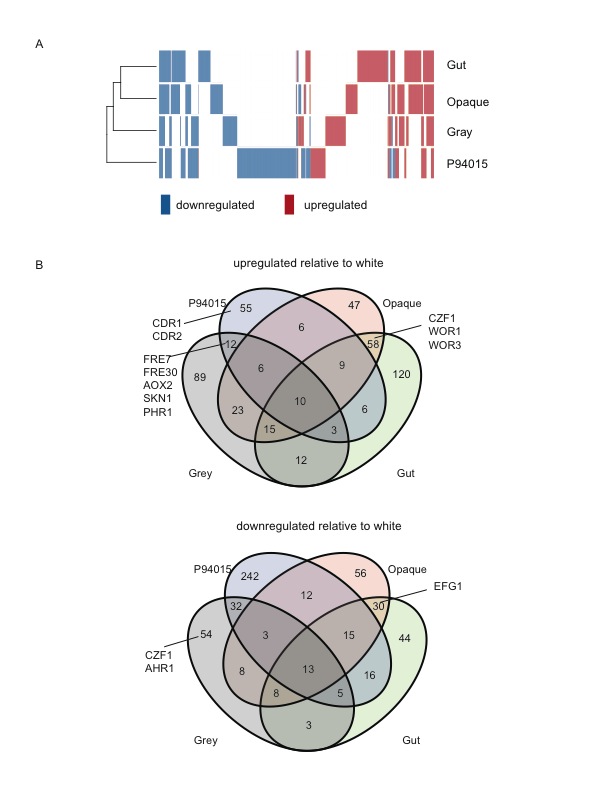
**

**Figure S10. Comparison of gene expression differences between P94014 cells, GUT cells, grey cells, and opaque cells.** Expression profiles show comparative gene expression differences relative to control white cells.The analysis shows that P94015 cells show expression differences that overlap with, but are also distinct from, the profiles of opaque, gray and GUT cells. (**A**) Genes with significant differential expression in each of the four conditions relative to white cells are shown as red bars (upregulated) or blue bars (down regulated). (**B**) Gene overlap for each of the differentially expressed sets is shown as venn diagrams. Master regulators of the white/opaque transcriptional circuit (*WOR1, WOR2, WOR3, CZF1, AHR1* and *EFG1*), genes involved in drug resistance (*CDR1* and *CDR2*), and other genes specific to P94015 and grey cells (*FRE7, FRE30, AOX2, SKN1*, and *PHR1*) are listed.


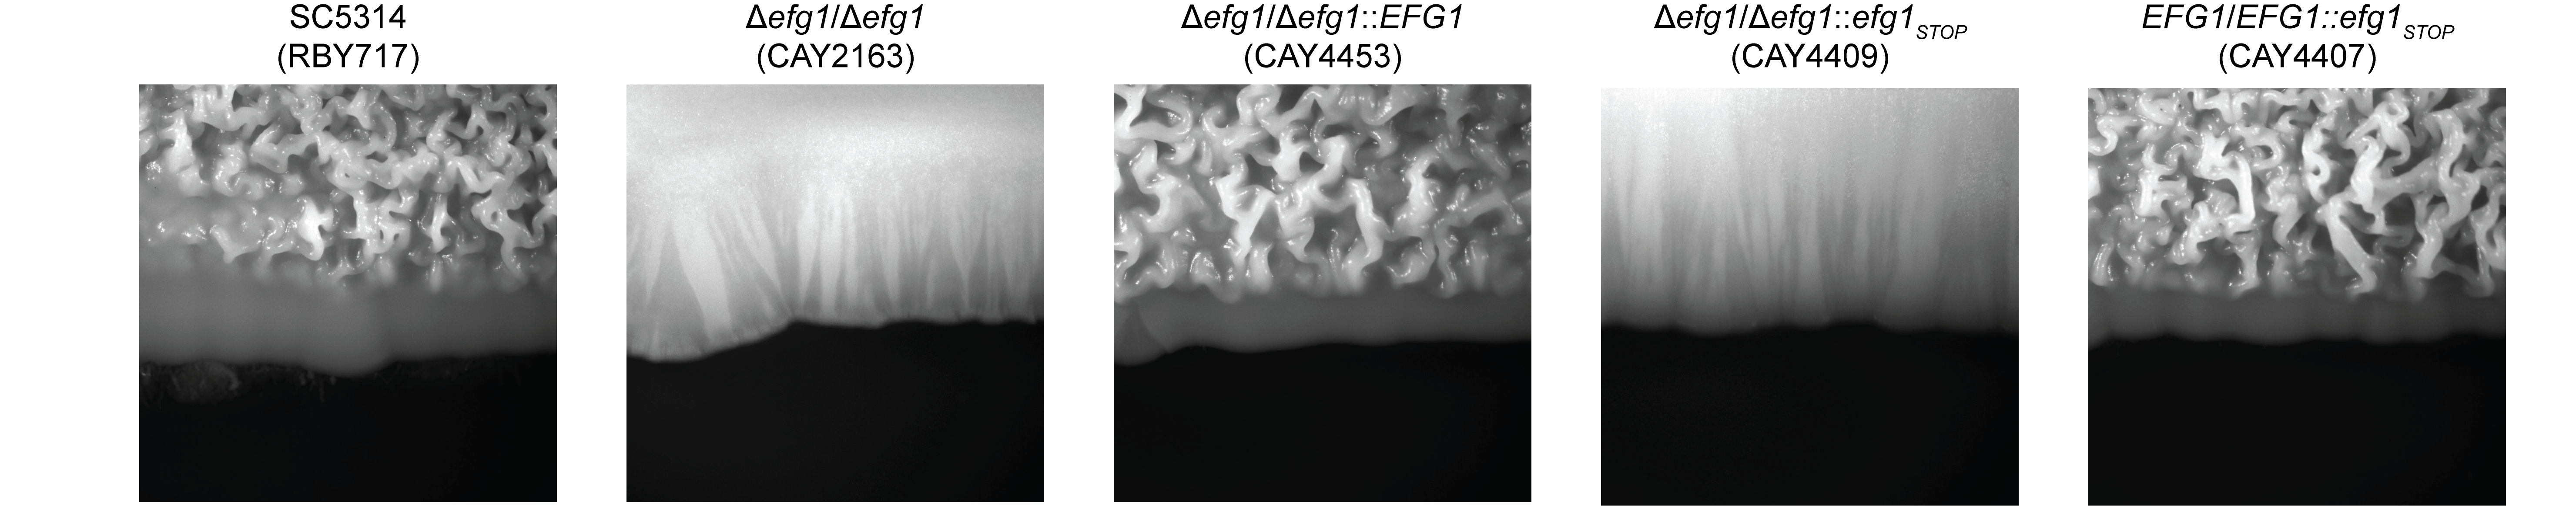


**Figure S11. Analysis of colony phenotypes in SC5314-derived strains expressing different *EFG1* alleles**. An SC5314-derived strain lacking *EFG1* (CAY2163) does not undergo colony wrinkling (a consequence of cell filamentation) when grown on YPD medium for 7 days at 37°C. Reintegration of full-length *EFG1* (CAY4453) restored filamentation and colony wrinkling. In contrast, integration of the *EFG1* allele from P94015 (*efg1STOP*) did not restore wrinkling (CAY4409). Furthermore, the *efg1STOP* allele does not interfere with filamentation/wrinkling when integrated into a wildtype SC5314 background (CAY4407). Similar filamentation profiles were also seen after 7 days on Spider medium at 30°C (data not shown).

**Figure S12. Commensal fitness of P94015 isolates**. Native P94015 or P94015 containing the full-length *EFG1* allele from SC5314 were compared for fitness in a murine model of commensalism. (**A**) Total number of colony-forming units (CFUs) per gram of feces during a 2-week infection. (**B**) CFUs per gram of individual strains during the competition experiment. (**C**) CFUs recovered from gastrointestinal tissues after 2-week infection. (**D**) Relative CFUs of individual strains recovered from GI tissues after 2-week infection. (**E**) *In vitro* competition of P94015 vs. P94015+*EFG1* strains grown in YPD medium at 30°C. Cells were diluted 1:200 daily for 7 days, and each day the relative CFUs of each strain were measured. (**F**) Representative growth curves of native P94015 and P94015+*EFG1* grown in YPD medium at 30°C. **, P<0.01; ***, P<0.001.

**Figure S13. Drug resistance levels in sequenced isolates.** Heatmap represents antifungal drug resistance generated from E-test assays. Light colors represent low MIC values and dark colors represent high MIC values. Actual MIC values are provided in **Table S7**.

**Table S1. Properties of sequenced isolates.** Virulence scores were calculated from previously published data using the murine model of systemic infection (Wu *et al*., 2007), as described in Methods**.**

**Table S2. Genome sequencing statistics.**

**Table S3. MLST typing and resulting diploid sequence type (DST).**

**Table S4. Genome assembly and gene statistics.**

**Table S7. Correlation analysis of phenotypic and genotypic traits.** Pairwise comparisons of traits were performed using a Spearman’s correlation analysis. The exception is for comparisons between aneuploid and euploid strains for which a student’s t test was used (see Methods).

| **Strain** | **Minimal Medium 30°C** | | | **SCD 30°C** | | | **Spider 30°C** | | | | **YPD 30°C** | | | | **YPD 37°C** | | | |
| --- | --- | --- | --- | --- | --- | --- | --- | --- | --- | --- | --- | --- | --- | --- | --- | --- | --- | --- |
| GC75 | 114 | ± | 6 | 112 | ± | 6 | | 111 | ± | 7 | | 96 | ± | 3 | | 79 | ± | 1 | |
| P75016 | 121 | ± | 12 | 117 | ± | 5 | | 118 | ± | 19 | | 95 | ± | 2 | | 73 | ± | 1 | |
| P75063 | 122 | ± | 16 | 110 | ± | 6 | | 107 | ± | 19 | | 98 | ± | 6 | | 76 | ± | 2 | |
| P87 | 122 | ± | 14 | 130 | ± | 10 | | 121 | ± | 14 | | 100 | ± | 3 | | 75 | ± | 2 | |
| P60002 | 134 | ± | 5 | 171 | ± | 21 | | 155 | ± | 5 | | 107 | ± | 9 | | 83 | ± | 8 | |
| P94015 | 150 | ± | 10 | 123 | ± | 5 | | 144 | ± | 8 | | 126 | ± | 5 | | 109 | ± | 2 | |
| P34048 | 114 | ± | 9 | 106 | ± | 4 | | 103 | ± | 13 | | 95 | ± | 7 | | 78 | ± | 2 | |
| P78042 | 126 | ± | 8 | 162 | ± | 24 | | 155 | ± | 14 | | 112 | ± | 9 | | 104 | ± | 8 | |
| P57055 | 126 | ± | 13 | 137 | ± | 8 | | 125 | ± | 16 | | 97 | ± | 2 | | 77 | ± | 1 | |
| P57072 | 113 | ± | 14 | 120 | ± | 11 | | 109 | ± | 18 | | 104 | ± | 12 | | 97 | ± | 8 | |
| P76055 | 118 | ± | 7 | 120 | ± | 12 | | 128 | ± | 3 | | 107 | ± | 6 | | 116 | ± | 12 | |
| P76067 | 121 | ± | 4 | 145 | ± | 13 | | 153 | ± | 13 | | 138 | ± | 19 | | 138 | ± | 2 | |
| P75010 | 127 | ± | 6 | 129 | ± | 10 | | 129 | ± | 10 | | 114 | ± | 5 | | 88 | ± | 4 | |
| 19F | 125 | ± | 15 | 133 | ± | 12 | | 130 | ± | 19 | | 115 | ± | 2 | | 93 | ± | 2 | |
| L26 | 125 | ± | 11 | 122 | ± | 4 | | 151 | ± | 23 | | 105 | ± | 9 | | 89 | ± | 2 | |
| P37039 | 125 | ± | 18 | 123 | ± | 10 | | 107 | ± | 16 | | 108 | ± | 9 | | 86 | ± | 2 | |
| 12C | 124 | ± | 9 | 124 | ± | 6 | | 126 | ± | 14 | | 114 | ± | 5 | | 93 | ± | 4 | |
| P37005 | 125 | ± | 10 | 124 | ± | 9 | | 120 | ± | 7 | | 108 | ± | 7 | | 82 | ± | 2 | |
| P37037 | 154 | ± | 21 | 156 | ± | 8 | | 165 | ± | 23 | | 117 | ± | 6 | | 112 | ± | 9 | |
| P78048 | 114 | ± | 11 | 120 | ± | 5 | | 115 | ± | 16 | | 106 | ± | 9 | | 87 | ± | 8 | |
| SC5314 | 120 | ± | 8 | 124 | ± | 12 | | 141 | ± | 10 | | 95 | ± | 5 | | 80 | ± | 4 | |

**Table S6. Growth rates of *C. albicans* isolates in different culture conditions.** Doubling times are minutes ± standard error of the mean (n=3 biological replicates).

| **Strain** | **FC** | **AP** | **CS** | **VO** | **FL** |
| --- | --- | --- | --- | --- | --- |
| GC75 | 11 ± 7 | < 0.2 | < 0.05 | < 0.08 | < 1.0 |
| P75016 | < 6 | < 0.2 | < 0.05 | < 0.08 | < 1.0 |
| P75063 | < 6 | < 0.2 | < 0.05 | < 0.08 | < 1.0 |
| P87 | < 6 | < 0.2 | < 0.05 | < 0.08 | < 1.0 |
| P60002 | < 6 | < 0.2 | < 0.05 | >32 | >256 |
| P94015 | >32 | < 0.2 | < 0.05 | 4.5 ± 2 | >256 |
| P34048 | < 6 | < 0.2 | < 0.05 | < 0.08 | < 1.0 |
| P78042 | < 6 | < 0.2 | < 0.05 | < 0.08 | < 1.0 |
| P57055 | < 6 | < 0.2 | < 0.05 | < 0.08 | < 1.0 |
| P57072 | < 6 | < 0.2 | < 0.05 | < 0.08 | < 1.0 |
| P76055 | < 6 | < 0.2 | < 0.05 | < 0.08 | < 1.0 |
| P76067 | < 6 | < 0.2 | < 0.05 | < 0.08 | < 1.0 |
| P75010 | < 6 | < 0.2 | < 0.05 | < 0.08 | < 1.0 |
| 19F | >32 | < 0.2 | < 0.05 | < 0.08 | < 1.0 |
| L26 | >32 | < 0.2 | < 0.05 | < 0.08 | 1.9 ± 1.6 |
| P37039 | 22 ± 14 | < 0.2 | < 0.05 | < 0.08 | < 1.0 |
| 12C | >32 | < 0.2 | < 0.05 | < 0.08 | < 1.0 |
| P37005 | >32 | < 0.2 | < 0.05 | < 0.08 | < 1.0 |
| P37037 | >32 | < 0.2 | < 0.05 | < 0.08 | < 1.0 |
| P78048 | < 6 | < 0.2 | < 0.05 | < 0.08 | < 1.0 |
| SC5314 | < 6 | < 0.2 | < 0.05 | < 0.08 | < 1.0 |

**Table S7. Drug MIC values in *C. albicans* isolates.** MIC values shown for five antifungal drugs ± standard deviation (n=2 biological replicates). Values determined after 48 h growth using Etest strips. Values in red are strains that show elevated resistance. FC = Flucytosine, AP = Amphoteracin B, CS = Caspofungin, VO = Voriconazole, FL = Fluconazole.

**Table S8. *FUR1* amino acid mutations associated with flucytosine drug resistance in the sequenced isolates.**

**Table S9. *ERG11* amino acid mutations in sequenced isolates.** Only P60002 and P94015 were resistant to azole drugs.

|  | **P94015** | | **P60002** | |
| --- | --- | --- | --- | --- |
| Gene | log2FC | p-value | log2FC | p-value |
| ***CDR1*** | 3.80 | 2.67E-08 |  |  |
| ***CDR2*** | 5.91 | 2.04E-21 |  |  |
| ***TAC1*** | 1.89 | 1.23E-03 |  |  |
| ***MDR1*** |  |  | -3.69 | 2.53E-05 |
| ***CDR11*** |  |  | 1.82 | 4.26E-03 |
| ***QDR1*** |  |  | 1.52 | 4.54E-02 |
| ***ERG11*** | -2.07 | 1.39E-03 |  |  |

**Table S10. Differential expression of genes involved in drug resistance.** Both P94015 and P60002 strains were resistant to azole drugs. Expression differences were compared to control strains as described in Methods. log2FC, log2 fold change. p-values corrected for multiple testing in EdgeR using the Benjamini and Hochberg method. Only significant (corrected p-value<0.05) changes in expression are shown.

**Table S11. ORFs exhibiting significant copy number variation.** Regions of the genome showing copy number variation were determined from relative sequencing read depth (RD) across chromosomes (see Methods). Table shows ORFs with altered copy number across the 21 *C. albicans* isolates.

**Table S12. Subtelomeric *TLO* genes in *C. albicans*.**  Table shows number of *TLO* genes present at subtelomeric regions varies from 10 to 15 genes. Some strains showed evidence of *TLO* families outside of the conventional , and  clades.

**Table S13. Inversions supported by genome assemblies and read mapping using BreakDancer.**

**Table S14. Omega (*d*N/*d*S) values for each gene**.

See separate file

**Table S15. Homozygous SNPs resulting in nonsense mutations.**

See separate file

**Table S16. Indel mutations resulting in premature stop codons.**

See separate file

| **Strain #** | **Strain Background** | **Genotype** | **Source** |
| --- | --- | --- | --- |
| RBY717 | SC5314 | *MTL****a/****MTL****a**** | ([Bennett et al. 2003](#_ENREF_4)) |
| RBY1173 | SC5314 | *MTL****a/****MTL****a*** leu2::hisG/leu2::hisG his1::hisG/HIS1 | ([Bennett and Johnson 2006](#_ENREF_3)) |
| CAY710 | P94015 | *MTL****a/****MTL****a*** Wildtype | ([Wu et al. 2007](#_ENREF_70)) |
| CAY2163 | SC5314 | *MTL****a***/*MTLα*Δ::*SAT1-FLIP* *efg1*Δ/*efg1*Δ | ([Si et al. 2013](#_ENREF_61)) |
| CAY3068 | SC5314 | *MTL****a/****MTL****a*** leu2::hisG/leu2::hisG his1::hisG/HIS1 *pOP4-GFP* | This study |
| CAY3070 | SC5314 | *MTL****a/****MTL****a*** leu2::hisG/leu2::hisG his1::hisG/HIS1 *pWH11-GFP* | This study |
| CAY3285 | SC5314 | *MTL****a/****MTL****a*** *pACT1-Wor1*::*HYG** | ([Si et al. 2013](#_ENREF_61)) |
| CAY3968 | P94015 | *MTL****a/****MTL****a*** *pWH11-GFP*::*SAT1* | This study |
| CAY4407 | SC5314 | *MTL****a/****MTL****a*** *EFG1*/*EFG1*::*efg1STOP*::*HYG** | This study |
| CAY4409 | SC5314 | *MTL****a***/*MTLα*Δ::*SAT1-FLIP efg1*Δ/*efg1*Δ::*efg1STOP*::*HYG* | This study |
| CAY4453 | SC5314 | *MTL****a***/*MTLα*Δ::*SAT1-FLIP efg1*Δ/*efg1*Δ::*EFG1*::*SAT1* | This study |
| CAY4458 | P94015 | *MTL****a/****MTL****a*** *EFG1*/*EFG1*::*EFG1SC5314*::*SAT1* | This study |
| CAY4497 | P94015 | *MTL****a/****MTL****a*** *pOP4-GFP*::*SAT1* | This study |
| CAY4499 | P94015 | *MTL****a/****MTL****a*** *EFG1*/*EFG1*::*EFG1SC5314*::*SAT1* | This study |

* Strain genotypes also contain *URA3/ura3*::imm434 *IRO1/iro1*::imm434

**Table S17. Strains constructed in this study.** The allele *efg1STOP* refers to the truncated *EFG1* allele from P94015, while *EFG1SC5314* refers to the full-length allele from SC5314.

**Table S18. RNA-Seq based differential expression of P94015 and P60002**.

See separate file.

**References**

Abyzov A, Urban AE, Snyder M, Gerstein M. 2011. CNVnator: an approach to discover, genotype, and characterize typical and atypical CNVs from family and population genome sequencing. *Genome research* **21**(6): 974-984.

Anderson MZ, Baller JA, Dulmage K, Wigen L, Berman J. 2012. The three clades of the telomere-associated *TLO* gene family of *Candida albicans* have different splicing, localization, and expression features. *Eukaryot Cell* **11**(10): 1268-1275.

Bennett RJ, Johnson AD. 2006. The role of nutrient regulation and the Gpa2 protein in the mating pheromone response of *C. albicans*. *Mol Microbiol* **62**(1): 100-119.

Bennett RJ, Uhl MA, Miller MG, Johnson AD. 2003. Identification and characterization of a *Candida albicans* mating pheromone. *Mol Cell Biol* **23**(22): 8189-8201.

Birney E, Clamp M, Durbin R. 2004. GeneWise and Genomewise. *Genome research* **14**(5): 988-995.

Braun BR, Johnson AD. 2000. *TUP1, CPH1* and *EFG1* make independent contributions to filamentation in *Candida albicans*. *Genetics* **155**(1): 57-67.

Butler G, Rasmussen MD, Lin MF, Santos MA, Sakthikumar S, Munro CA, Rheinbay E, Grabherr M, Forche A, Reedy JL et al. 2009. Evolution of pathogenicity and sexual reproduction in eight *Candida* genomes. *Nature* **459**(7247): 657-662.

Carreto L, Eiriz MF, Gomes AC, Pereira PM, Schuller D, Santos MA. 2008. Comparative genomics of wild type yeast strains unveils important genome diversity. *BMC genomics* **9**: 524.

Chen K, Wallis JW, McLellan MD, Larson DE, Kalicki JM, Pohl CS, McGrath SD, Wendl MC, Zhang Q, Locke DP et al. 2009. BreakDancer: an algorithm for high-resolution mapping of genomic structural variation. *Nature methods* **6**(9): 677-681.

Chen X, Magee BB, Dawson D, Magee PT, Kumamoto CA. 2004. Chromosome 1 trisomy compromises the virulence of *Candida albicans*. *Mol Microbiol* **51**(2): 551-565.

Coste AT, Crittin J, Bauser C, Rohde B, Sanglard D. 2009. Functional analysis of cis- and trans-acting elements of the *Candida albicans CDR2* promoter with a novel promoter reporter system. *Eukaryot Cell* **8**(8): 1250-1267.

Cowen LE. 2008. The evolution of fungal drug resistance: modulating the trajectory from genotype to phenotype. *Nat Rev Microbiol* **6**(3): 187-198.

Cuomo CA, Desjardins CA, Bakowski MA, Goldberg J, Ma AT, Becnel JJ, Didier ES, Fan L, Heiman DI, Levin JZ et al. 2012. Microsporidian genome analysis reveals evolutionary strategies for obligate intracellular growth. *Genome research* **22**(12): 2478-2488.

Dodgson AR, Dodgson KJ, Pujol C, Pfaller MA, Soll DR. 2004. Clade-specific flucytosine resistance is due to a single nucleotide change in the *FUR1* gene of *Candida albicans*. *Antimicrob Agents Chemother* **48**(6): 2223-2227.

Edgar RC. 2004. MUSCLE: multiple sequence alignment with high accuracy and high throughput. *Nucleic Acids Res* **32**(5): 1792-1797.

Fisher S, Barry A, Abreu J, Minie B, Nolan J, Delorey TM, Young G, Fennell TJ, Allen A, Ambrogio L et al. 2011. A scalable, fully automated process for construction of sequence-ready human exome targeted capture libraries. *Genome Biol* **12**(1): R1.

Forche A, Alby K, Schaefer D, Johnson AD, Berman J, Bennett RJ. 2008. The parasexual cycle in *Candida albicans* provides an alternative pathway to meiosis for the formation of recombinant strains. *PLoS Biol* **6**(5): e110.

Fuchs BB, Eby J, Nobile CJ, El Khoury JB, Mitchell AP, Mylonakis E. 2010. Role of filamentation in *Galleria mellonella* killing by *Candida albicans*. *Microbes and infection / Institut Pasteur* **12**(6): 488-496.

Gnerre S, Maccallum I, Przybylski D, Ribeiro FJ, Burton JN, Walker BJ, Sharpe T, Hall G, Shea TP, Sykes S et al. 2011. High-quality draft assemblies of mammalian genomes from massively parallel sequence data. *Proc Natl Acad Sci U S A* **108**(4): 1513-1518.

Grabherr MG, Haas BJ, Yassour M, Levin JZ, Thompson DA, Amit I, Adiconis X, Fan L, Raychowdhury R, Zeng Q et al. 2011. Full-length transcriptome assembly from RNA-Seq data without a reference genome. *Nat Biotechnol* **29**(7): 644-652.

Grad YH, Lipsitch M, Feldgarden M, Arachchi HM, Cerqueira GC, Fitzgerald M, Godfrey P, Haas BJ, Murphy CI, Russ C et al. 2012. Genomic epidemiology of the Escherichia coli O104:H4 outbreaks in Europe, 2011. *Proc Natl Acad Sci U S A* **109**(8): 3065-3070.

Haas BJ, Salzberg SL, Zhu W, Pertea M, Allen JE, Orvis J, White O, Buell CR, Wortman JR. 2008. Automated eukaryotic gene structure annotation using EVidenceModeler and the Program to Assemble Spliced Alignments. *Genome Biol* **9**(1): R7.

Hernday AD, Lohse MB, Fordyce PM, Nobile CJ, DeRisi JL, Johnson AD. 2013. Structure of the transcriptional network controlling white-opaque switching in *Candida albicans*. *Mol Microbiol* **90**(1): 22-35.

Hernday AD, Noble SM, Mitrovich QM, Johnson AD. 2010. Genetics and molecular biology in *Candida albicans*. *Methods Enzymol* **470**: 737-758.

Hoffman CS, Winston F. 1987. A ten-minute DNA preparation from yeast efficiently releases autonomous plasmids for transformation of *Escherichia coli*. *Gene* **57**(2-3): 267-272.

Hope WW, Tabernero L, Denning DW, Anderson MJ. 2004. Molecular mechanisms of primary resistance to flucytosine in *Candida albicans*. *Antimicrob Agents Chemother* **48**(11): 4377-4386.

Hull CM, Raisner RM, Johnson AD. 2000. Evidence for mating of the "asexual" yeast *Candida albicans* in a mammalian host. *Science* **289**(5477): 307-310.

Hyatt D, Chen GL, Locascio PF, Land ML, Larimer FW, Hauser LJ. 2010. Prodigal: prokaryotic gene recognition and translation initiation site identification. *BMC bioinformatics* **11**: 119.

Korting HC, Hube B, Oberbauer S, Januschke E, Hamm G, Albrecht A, Borelli C, Schaller M. 2003. Reduced expression of the hyphal-independent *Candida albicans* proteinase genes *SAP1* and *SAP3* in the *efg1* mutant is associated with attenuated virulence during infection of oral epithelium. *Journal of medical microbiology* **52**(Pt 8): 623-632.

Kurtz S, Phillippy A, Delcher AL, Smoot M, Shumway M, Antonescu C, Salzberg SL. 2004. Versatile and open software for comparing large genomes. *Genome Biol* **5**(2): R12.

Kyes SA, Kraemer SM, Smith JD. 2007. Antigenic variation in *Plasmodium falciparum*: gene organization and regulation of the *var* multigene family. *Eukaryot Cell* **6**(9): 1511-1520.

Lamb DC, Kelly DE, White TC, Kelly SL. 2000. The R467K amino acid substitution in *Candida albicans* sterol 14alpha-demethylase causes drug resistance through reduced affinity. *Antimicrob Agents Chemother* **44**(1): 63-67.

Langmead B, Trapnell C, Pop M, Salzberg SL. 2009. Ultrafast and memory-efficient alignment of short DNA sequences to the human genome. *Genome Biol* **10**(3): R25.

Levin JZ, Yassour M, Adiconis X, Nusbaum C, Thompson DA, Friedman N, Gnirke A, Regev A. 2010. Comprehensive comparative analysis of strand-specific RNA sequencing methods. *Nature methods* **7**(9): 709-715.

Li B, Dewey CN. 2011. RSEM: accurate transcript quantification from RNA-Seq data with or without a reference genome. *BMC bioinformatics* **12**: 323.

Li H, Durbin R. 2010. Fast and accurate long-read alignment with Burrows-Wheeler transform. *Bioinformatics* **26**(5): 589-595.

Li H, Handsaker B, Wysoker A, Fennell T, Ruan J, Homer N, Marth G, Abecasis G, Durbin R. 2009. The Sequence Alignment/Map format and SAMtools. *Bioinformatics* **25**(16): 2078-2079.

Li L, Stoeckert CJ, Jr., Roos DS. 2003. OrthoMCL: identification of ortholog groups for eukaryotic genomes. *Genome research* **13**(9): 2178-2189.

Li W, Godzik A. 2006. Cd-hit: a fast program for clustering and comparing large sets of protein or nucleotide sequences. *Bioinformatics* **22**(13): 1658-1659.

Lo HJ, Kohler JR, DiDomenico B, Loebenberg D, Cacciapuoti A, Fink GR. 1997. Nonfilamentous *C. albicans* mutants are avirulent. *Cell* **90**(5): 939-949.

MacCallum DM, Castillo L, Nather K, Munro CA, Brown AJ, Gow NA, Odds FC. 2009. Property differences among the four major *Candida albicans* strain clades. *Eukaryot Cell* **8**(3): 373-387.

McKenna A, Hanna M, Banks E, Sivachenko A, Cibulskis K, Kernytsky A, Garimella K, Altshuler D, Gabriel S, Daly M et al. 2010. The Genome Analysis Toolkit: a MapReduce framework for analyzing next-generation DNA sequencing data. *Genome research* **20**(9): 1297-1303.

Nobile CJ, Fox EP, Nett JE, Sorrells TR, Mitrovich QM, Hernday AD, Tuch BB, Andes DR, Johnson AD. 2012. A recently evolved transcriptional network controls biofilm development in *Candida albicans*. *Cell* **148**(1-2): 126-138.

Nobile CJ, Mitchell AP. 2005. Regulation of cell-surface genes and biofilm formation by the *C. albicans* transcription factor Bcr1p. *Curr Biol* **15**(12): 1150-1155.

Noble SM, French S, Kohn LA, Chen V, Johnson AD. 2010. Systematic screens of a *Candida albicans* homozygous deletion library decouple morphogenetic switching and pathogenicity. *Nat Genet* **42**(7): 590-598.

Noffz CS, Liedschulte V, Lengeler K, Ernst JF. 2008. Functional mapping of the *Candida albicans* Efg1 regulator. *Eukaryot Cell* **7**(5): 881-893.

Odds FC, Bougnoux ME, Shaw DJ, Bain JM, Davidson AD, Diogo D, Jacobsen MD, Lecomte M, Li SY, Tavanti A et al. 2007. Molecular phylogenetics of *Candida albicans*. *Eukaryot Cell* **6**(6): 1041-1052.

Pande K, Chen C, Noble SM. 2013. Passage through the mammalian gut triggers a phenotypic switch that promotes *Candida albicans* commensalism. *Nat Genet*.

Park BJ, Arthington-Skaggs BA, Hajjeh RA, Iqbal N, Ciblak MA, Lee-Yang W, Hairston MD, Phelan M, Plikaytis BD, Sofair AN et al. 2006. Evaluation of amphotericin B interpretive breakpoints for *Candida* bloodstream isolates by correlation with therapeutic outcome. *Antimicrob Agents Chemother* **50**(4): 1287-1292.

Parkhomchuk D, Borodina T, Amstislavskiy V, Banaru M, Hallen L, Krobitsch S, Lehrach H, Soldatov A. 2009. Transcriptome analysis by strand-specific sequencing of complementary DNA. *Nucleic Acids Res* **37**(18): e123.

Perea S, Lopez-Ribot JL, Kirkpatrick WR, McAtee RK, Santillan RA, Martinez M, Calabrese D, Sanglard D, Patterson TF. 2001. Prevalence of molecular mechanisms of resistance to azole antifungal agents in *Candida albicans* strains displaying high-level fluconazole resistance isolated from human immunodeficiency virus-infected patients. *Antimicrob Agents Chemother* **45**(10): 2676-2684.

Pfaller MA, Diekema DJ, Andes D, Arendrup MC, Brown SD, Lockhart SR, Motyl M, Perlin DS. 2011. Clinical breakpoints for the echinocandins and *Candida* revisited: integration of molecular, clinical, and microbiological data to arrive at species-specific interpretive criteria. *Drug resistance updates : reviews and commentaries in antimicrobial and anticancer chemotherapy* **14**(3): 164-176.

Pujol C, Pfaller MA, Soll DR. 2004. Flucytosine resistance is restricted to a single genetic clade of *Candida albicans*. *Antimicrob Agents Chemother* **48**(1): 262-266.

RCoreTeam. 2014. R: A language and environment for statistical computing. *R Foundation for Statistical Computing*.

Reuss O, Vik A, Kolter R, Morschhauser J. 2004. The *SAT1* flipper, an optimized tool for gene disruption in *Candida albicans*. *Gene* **341**: 119-127.

Risso D, Schwartz K, Sherlock G, Dudoit S. 2011. GC-content normalization for RNA-Seq data. *BMC bioinformatics* **12**: 480.

Sanglard D, Ischer F, Monod M, Bille J. 1997. Cloning of *Candida albicans* genes conferring resistance to azole antifungal agents: characterization of *CDR2*, a new multidrug ABC transporter gene. *Microbiology* **143 ( Pt 2)**: 405-416.

Sanglard D, Kuchler K, Ischer F, Pagani JL, Monod M, Bille J. 1995. Mechanisms of resistance to azole antifungal agents in *Candida albicans* isolates from AIDS patients involve specific multidrug transporters. *Antimicrob Agents Chemother* **39**(11): 2378-2386.

Selmecki A, Forche A, Berman J. 2006. Aneuploidy and isochromosome formation in drug-resistant *Candida albicans*. *Science* **313**(5785): 367-370.

Selmecki A, Gerami-Nejad M, Paulson C, Forche A, Berman J. 2008. An isochromosome confers drug resistance in vivo by amplification of two genes, *ERG11* and *TAC1*. *Mol Microbiol* **68**(3): 624-641.

Si H, Hernday AD, Hirakawa MP, Johnson AD, Bennett RJ. 2013. *Candida albicans* white and opaque cells undergo distinct programs of filamentous growth. *PLoS Pathog* **9**(3): e1003210.

Sonneborn A, Tebarth B, Ernst JF. 1999. Control of white-opaque phenotypic switching in *Candida albicans* by the Efg1p morphogenetic regulator. *Infect Immun* **67**(9): 4655-4660.

Srikantha T, Tsai LK, Daniels K, Soll DR. 2000. *EFG1* null mutants of *Candida albicans* switch but cannot express the complete phenotype of white-phase budding cells. *J Bacteriol* **182**(6): 1580-1591.

Stoldt VR, Sonneborn A, Leuker CE, Ernst JF. 1997. Efg1p, an essential regulator of morphogenesis of the human pathogen *Candida albicans*, is a member of a conserved class of bHLH proteins regulating morphogenetic processes in fungi. *EMBO J* **16**(8): 1982-1991.

Sudbery PE. 2011. Growth of *Candida albicans* hyphae. *Nat Rev Microbiol* **9**(10): 737-748.

Swofford DL. 2002. PAUP*. Phylogenetic Analysis Using Parsimony (*and Other Methods). *Sinauer Associates, Sunderland, Massachusetts*.

Tao L, Du H, Guan G, Dai Y, Nobile CJ, Liang W, Cao C, Zhang Q, Zhong J, Huang G. 2014. Discovery of a "white-gray-opaque" tristable phenotypic switching system in *Candida albicans*: roles of non-genetic diversity in host adaptation. *PLoS Biol* **12**(4): e1001830.

Tavanti A, Gow NA, Senesi S, Maiden MC, Odds FC. 2003. Optimization and validation of multilocus sequence typing for *Candida albicans*. *J Clin Microbiol* **41**(8): 3765-3776.

Tuch BB, Mitrovich QM, Homann OR, Hernday AD, Monighetti CK, De La Vega FM, Johnson AD. 2010. The transcriptomes of two heritable cell types illuminate the circuit governing their differentiation. *PLoS Genet* **6**(8): e1001070.

Wu W, Lockhart SR, Pujol C, Srikantha T, Soll DR. 2007. Heterozygosity of genes on the sex chromosome regulates *Candida albicans* virulence. *Mol Microbiol* **64**(6): 1587-1604.

Yang Z. 1997. PAML: a program package for phylogenetic analysis by maximum likelihood. *Computer applications in the biosciences : CABIOS* **13**(5): 555-556.

Zordan RE, Miller MG, Galgoczy DJ, Tuch BB, Johnson AD. 2007. Interlocking transcriptional feedback loops control white-opaque switching in *Candida albicans*. *PLoS Biol* **5**(10): e256.
