# Supplementary material for: Genetic and phenotypic intra-species variation in Candida albicans
Source: HighWire-hosted journal article supplement (doi:10.1101/gr.174623.114), 2014-12-11
Supplement: TableS15.xlsx [file TableS15.xlsx]

## Sheet: NonsenseSNPs
Table S15. Homosyzous SNPs resulting in nonsense mutations.
Strain	Chromosome¹	position (nt)	Orf19 id	codon (WT-mut)	AA_mutation (WT-mut)
P57072, P76055, P76067	Chr1	4069	orf19.6115	tTc-tAg	F->*
P94015	Chr1	151391	orf19.6027	Cga-Tga	R->*
P37005, P37039, P57072, P76067	Chr1	345705	orf19.3359	Aag-Tag	K->*
P60002	Chr1	431882	orf19.3666	Cag-Tag	Q->*
P94015	Chr1	628999	orf19.2991	Caa-Taa	Q->*
P57055	Chr1	821265	orf19.4461	tgT-tgA	C->*
P57055, P78042, P94015	Chr1	834899	orf19.4471	Gga-Tga	G->*
P57072, P76055	Chr1	982433	orf19.772.1	tTa-tGa	L->*
P75016	Chr1	1004249	orf19.760	Aga-Tga	R->*
P57072	Chr1	1132705	orf19.427	Caa-Taa	Q->*
P94105	Chr1	1220027	orf19.2462	tTa-tAa	L->*
L26, P34048, P57055, P57072, P75010, P78042, P94015	Chr1	1286289	orf19.2431	Aga-Tga	R->*
GC75, P57072, P60002, P75016, P75063, P76055, P76067, P78042, P87	Chr1	1324648	orf19.1821	Aaa-Taa	K->*
P57055	Chr1	1340478	orf19.6280	tCa-tAa	S->*
P75063	Chr1	1390600	orf19.6260	Caa-Taa	Q->*
GC75	Chr1	1413153	orf19.6249	tGg-tAg	W->*
12C, P37005	Chr1	1465751	orf19.6222	tGg-tAg	W->*
P75063, P76055, P94015	Chr1	1730146	orf19.5066	tgG-tgA	W->*
P37037, P57072, P60002, P76055, P76067, P94015	Chr1	1969044	orf19.4760	Aaa-Taa	K->*
P76067	Chr1	1970119	orf19.4761	Gaa-Taa	E->*
P75063	Chr1	2112831	orf19.4822	taC-taA	Y->*
P60002	Chr1	2115039	orf19.4823	tgG-tgA	W->*
p75016	Chr1	2259537	orf19.4893	Cag-Tag	Q->*
P75063, P87	Chr1	2285852	orf19.4905	tTa-tAa	L->*
P34048	Chr1	2335239	orf19.999	Caa-Taa	Q->*
P34048, P57055, P57072, P75010, P75016, P75063, P76055, P76067, P78042, P87, P94015	Chr1	2348998	orf19.1831	Caa-Taa	Q->*
GC75, P75016, P75063, P87, P94015	Chr1	2357354	orf19.1835	tCa-tAa	S->*
P75016	Chr1	2431398	orf19.2312	tgG-tgA	W->*
P76067	Chr1	2497121	orf19.664	Cga-Tga	R->*
GC75, P34048, P57055, P57072, P60002, P75010, P75016, P75063, P65055, P76067, P78042, P87, P94015	Chr1	2632176	orf19.5264	Cca-Taa	P->*
P94015	Chr1	2772930	orf19.6350	Cga-Tga	R->*
P75010	Chr1	2853835	orf19.4936	Gaa-Taa	E->*
GC75, P37037, P57072, P60002, P75016, P75063, P76055, P76067, P78048, P87, P94015	Chr1	2883144	orf19.4949	tgG-tgA	W->*
19F, P37037	Chr1	2906324	orf19.4959	Caa-Taa	Q->*
19F	Chr1	2913073	orf19.4961	Gta-Taa	V->*
P34048	Chr1	2926266	orf19.4969	Cga-Tga	R->*
P75010	Chr1	2959376	orf19.4981	Caa-Taa	Q->*
P34048, P37005, P75010	Chr1	2964565	orf19.4984	tTa-tGa	L->*
P60002, P75063, P87	Chr1	2964621	orf19.4984	tTa-tGa	L->*
19F, P37037	Chr1	2964833	orf19.4984	tTa-tGa	L->*
19F, GC75, P37037, 57072, P60002, P75016, P75063, P76055, P76067, P87, P94015	Chr1	3020303	orf19.5012	Aga-Tga	R->*
P60002	Chr1	3039119	orf19.5021	Aag-Tag	K->*
P87	Chr1	3076158	orf19.5033	Cag-Tag	Q->*
P75063, P87	Chr1	3082060	orf19.7205	tCg-tAg	S->*
P57072, P76055	Chr1	3154868	orf19.7242	Caa-Taa	Q->*
GC75, P75016, P75063, P87	Chr1	3185833	orf19.7277	tGg-tAg	W->*
P94015	Chr2	31802	orf19.2108	cgG-tgA	R->*
P34048, P57055, P78042, P94015	Chr2	161409	orf19.2025	Caa-Taa	Q->*
19F, P37005, P37039, P75063, P87, 19F, 37005, P37039, P75063, P87	Chr2	163129	orf19.2024	Ggg-Tga	G->*
GC75, P60002	Chr2	225358	orf19.1994	tCa-tAa	S->*
P60002, P75016	Chr2	461937	orf19.1551	tGg-tAg	W->*
12C, GC75, P34048, P37005, P37037, P57055, P57072, P75016, P76055, P76067, P78042, P87	Chr2	469172	orf19.1557	tgG-tgA	W->*
P57055, P76067	Chr2	517913	orf19.1581	taT-taG	Y->*
P34048, P37005, P37039, P57055, P60002, P75010, P76067, P78042, P94015	Chr2	615135	orf19.5796	tTa-tGa	L->*
GC75, P37039, P60002, P75010, P75016, P75063, P76055, P87	Chr2	693387	orf19.894	taT-taG	Y->*
P76067	Chr2	707981	orf19.882	taT-taA	Y->*
GC75, P34048, P57055, P57072, P60002, P76055, P76067, P78042	Chr2	725223	orf19.873	Aga-Tga	R->*
GC75	Chr2	778798	orf19.851	Cag-Tag	Q->*
GC75, P34048, P57055, P57072, P60002, P75016, P75063, P76055, P78042, P87, P94015	Chr2	928829	orf19.4509	taC-taA	Y->*
P94015	Chr2	982433	orf19.813	Caa-Taa	Q->*
P75010	Chr2	1002813	orf19.188	Aaa-Taa	K->*
P75010	Chr2	1053369	orf19.3540	Gaa-Taa	E->*
P34048, P57055, P57072, P60002, P75010, P76055, P76067, P78042, P94015	Chr2	1058681	orf19.3543	tTa-tAa	L->*
P34048	Chr2	1116388	orf19.3573	Caa-Taa	Q->*
P34048, P78042	Chr2	1269614	orf19.5486	tCa-tAa	S->*
P75010	Chr2	1277565	orf19.5491	Gga-Tga	G->*
P76067	Chr2	1320589	orf19.26	Aga-Tga	R->*
P78048, P87	Chr2	1345304	orf19.35.1	Caa-Taa	Q->*
P37005, P37039, P75063, P78042, P94015	Chr2	1412941	orf19.2241	tTg-tAg	L->*
GC75, P57072, P60002, P75016, P75063, P76055, P76067, P87	Chr2	1511560	orf19.1893	tgC-tgA	C->*
P57072, P76055, P76067, P94015	Chr2	1641907	orf19.2177	Cga-Tga	R->*
GC75,L26, P37037, P37039, P57055, P75063, P76067, P78042, P78048, P94015	Chr2	1657103	orf19.2168	Gaa-Taa	E->*
P75010	Chr2	1677164	orf19.1353	Gag-Tag	E->*
19F, P75016, P75063	Chr2	1679321	orf19.1351	tTa-tAa	L->*
P78048	Chr2	1779518	orf19.3600	tCa-tAa	S->*
P34048, P78042, P94015	Chr2	1807560	orf19.218	tGg-tAg	W->*
P76055, P76067	Chr2	1903908	orf19.4095	Gaa-Taa	E->*
GC75, P75016, P75063, P78042, P87	Chr2	2065567	orf19.1774	Caa-Taa	Q->*
12C, 19F, GC75, L26, P34048, P37005, P37037, P37039, P57055, P57072, P60002, P75010, P75016, P75063, P76055, P76067, P78042, P78048, P87, P94015, SC5314	Chr2	2129440	orf19.1745	taC-taG	Y->*
GC75, P75063	Chr2	2152592	orf19.3490	Caa-Taa	Q->*
P60002	Chr2	2187869	orf19.5339	tCa-tAa	S->*
12C, 19F, GC75, L26, P34048, P37005, P37037, P37039, P57055, P57072, P60002, P75010, P75016, P75063, P76055, P76067, P78042, P78048, P87, P94015, SC5314	Chr3	40518	orf19.5440	Caa-Taa	Q->*
P57072, P76055, P76067	Chr3	360855	orf19.1677	Caa-Taa	Q->*
GC75, P75063	Chr3	488602	orf19.1620	taT-taA	Y->*
GC75, P34048, P57055, P57072, P60002, P75010, P75016, P75063, P76055, P76067, P78042, P87, P94015	Chr3	626581	orf19.286	Aaa-Taa	K->*
12C, P78042, P94015	Chr3	765859	orf19.6957	taC-taG	Y->*
GC75, P34048, P57055, P75016, P75063, P78042, P87, P94015	Chr3	975853	orf19.5918	Cga-Tga	R->*
P75010	Chr3	1000554	orf19.5933	Cag-Tag	Q->*
P76055	Chr3	1044459	orf19.5954	Ggg-Tga	G->*
P76055	Chr3	1261368	orf19.6999	tGg-tAg	W->*
P76067, P60002	Chr3	1586692	orf19.6807	Cag-Tag	Q->*
12C	Chr3	1624074	orf19.6790	Caa-Taa	Q->*
P57072, P75010, P76055, P76067	Chr3	1660727	orf19.6777	Cag-Tag	Q->*
P34048	Chr3	1690397	orf19.6756	tgG-tgA	W->*
P37005, P37037	Chr4	83104	orf19.5677	tgG-tgA	W->*
P94015	Chr4	167173	orf19.4702	tgG-tgA	W->*
P76055	Chr4	180382	orf19.4697	tCa-tGa	S->*
12C, L26, P37005, P37037	Chr4	235594	orf19.4673	Caa-Taa	Q->*
P37037	Chr4	381482	orf19.4599	tGg-tAg	W->*
19F	Chr4	440242	orf19.4568	tCa-tAa	S->*
P34048, P57072, P75010, P76055, P76067	Chr4	479689	orf19.2766	Caa-Taa	Q->*
19F, P37037	Chr4	587178	orf19.2713	tgG-tgA	W->*
P34048, P37037, P57055, P76055, P76067, P78042	Chr4	713439	orf19.3368	Aaa-Taa	K->*
P57072, P60002	Chr4	713576	orf19.3368	Aaa-Taa	K->*
P94015	Chr4	713661	orf19.3368	Aaa-Taa	K->*
P94015	Chr4	783508	orf19.1311	tGg-tAg	W->*
GC75, P57072, P75016, P75063, P76055, P76067, P87	Chr4	832810	orf19.1596	Caa-Taa	Q->*
P57072, P60002	Chr4	833177	orf19.1596	Caa-Taa	Q->*
GC75, P34048, P57055, P75016, P75063, P78042, P87	Chr4	834136	orf19.1596	Caa-Taa	Q->*
L26, P94015	Chr4	875060	orf19.5302	taC-taA	Y->*
GC75, P34048, P57055, P57072, P60002, P75010, P75016, P75063, P76055, P76067, P78042, P87	Chr4	1104591	orf19.741	tgG-tgA	W->*
P57072, P76067, P78048, P87	Chr4	1412520	orf19.2899	Caa-Taa	Q->*
GC75, P60002, P75016, P75063, P87	Chr4	1537033	orf19.3121	Aaa-Taa	K->*
12C, 19F, GC75, L26, P37005, P37037, P37039, P57072, P75016, P75063, P76055, P76067, P78042, P78048, P87, P94015	Chr5	105121	orf19.937	Gag-Tag	E->*
P78042	Chr5	164949	orf19.570	tgG-tgA	W->*
P37005	Chr5	172471	orf19.575	Caa-Taa	Q->*
GC75, P34048, P75010, P75063, P76055, P76067, P94015	Chr5	196850	orf19.587	Gaa-Taa	E->*
P78048, P94015	Chr5	254995	orf19.1958	taC-taA	Y->*
GC75, P57072, P75010, P75106, P87	Chr5	296976	orf19.1935	tgG-tgA	W->*
P57055	Chr5	324083	orf19.4135	tGg-tAg	W->*
GC75	Chr5	413737	orf19.3190	Cga-Tga	R->*
P60002	Chr5	416867	orf19.3188	Caa-Taa	Q->*
P76067	Chr5	466760	orf19.3160	tgC-tgA	C->*
P60002	Chr5	534235	orf19.4250	Aaa-Taa	K->*
P78042	Chr5	924879	orf19.3897	Cag-Tag	Q->*
P75010	Chr5	942639	orf19.3907	Aaa-Taa	K->*
P57055, P60002, P75010, P78042, P75063	Chr5	983216	orf19.3935	Cag-Tag	Q->*
P60002	Chr5	1176296	orf19.4046	Cga-Tga	R->*
12C, 19F, L26	Chr5	1182188	orf19.4054	tTa-tAa	L->*
P60002, 12C, 19F, L26, P34048, P37005, P57072, P75010, P75016, P75063, P78042, P78048, GC75	Chr6	24917	orf19.1181	tgG-tgA	W->*
P76055, P76067	Chr6	107458	orf19.4200	Cag-Tag	Q->*
19F, L26, P37005, P37039, P57072, P6002, P76067, P78048, P94015	Chr6	242367	orf19.133	Caa-Taa	Q->*
P94015	Chr6	420485	orf19.3506	Caa-Taa	Q->*
12C	Chr6	424354	orf19.3505	Caa-Taa	Q->*
P34048, P57055, P57072, P60002, P75010, P76055, P76067, P78042, P94015	Chr6	583108	orf19.5556	Caa-Taa	Q->*
12C, 19F, L26, P37005, P75016, P75063, P87, SC5314	Chr6	685217	orf19.5612	taC-taA	Y->*
P60002	Chr6	780453	orf19.5735.3	Cag-Tag	Q->*
P76067	Chr6	902133	orf19.4555	tgG-tgA	W->*
Ca6	Chr6	978310	orf19.1097	tCa-tAa	S->*
12C, P37039	Chr6	992123	orf19.2128	Cag-Tag	Q->*
P60002	Chr7	3952, 3953	orf19.6338	aAa-tGa	K->*
P57055	Chr7	231428	orf19.6896	Caa-Taa	Q->*
P76055	Chr7	323008	orf19.6575	Cga-Taa	R->*
GC75, P57072, P60002, P75010, P75016, P75063, P76055, P76067, P87	Chr7	692303	orf19.5137	taT-taA	Y->*
P78042	Chr7	757155	orf19.1332	Caa-Taa	Q->*
P57055, P78042, P34048	Chr7	762555	orf19.1330	Gaa-Taa	E->*
L26, P78048	Chr7	765818	orf19.6704	taT-taG	Y->*
P60002	Chr7	859949	orf19.7192	taT-taG	Y->*
GC75, P57072, P76067	Chr7	323007, 323008	orf19.6575	Cga-Taa	R->*
P94015	ChrR	9548	orf19.7544	gaA-taG	E->*
P94015	ChrR	31301	orf19.7523	Gaa-Taa	E->*
19F, L26	ChrR	148158	orf19.7472	tTa-tGa	L->*
19F, P37005, P37037, P60002, P75010, P76055, P76067, P78042, P78048, P94015, SC5314	ChrR	168807	orf19.3286	Gaa-Taa	E->*
GC75, L26, P34048, P37039, P57055, P60002, P75016, P75063, P76067, P78042, P87	ChrR	269301	orf19.3238	tgG-tgA	W->*
P60002, P76067	ChrR	269304	orf19.3238	tgG-tgA	W->*
19F, L26, P37039, P57055, P57072, P76055, P76067, P94015	ChrR	419538	orf19.2585	taC-taG	Y->*
P94015	ChrR	536145	orf19.3726	Cag-Tag	Q->*
P34048, P57072, P76067	ChrR	609344	orf19.2825	caG-taA	Q->*
GC75, P57072, P75010, P756016, P75063, P76055, P76067, P87, P94015	ChrR	661736	orf19.2847.1	tgG-tgA	W->*
P60002, P75010, P76067	ChrR	661890	orf19.2847.1	tgG-tgA	W->*
P78042	ChrR	677593	orf19.2850	Caa-Taa	Q->*
12C, L26, P60002, P87, P94015	ChrR	1018579	orf19.1737	taC-taA	Y->*
P34048, P57055, P78042	ChrR	1084936	orf19.651	tgG-tgA	W->*
P34048, P57055, P57072, P76055, P76067, P78042, P94015	ChrR	1212509	orf19.6641	Caa-Taa	Q->*
GC75, P75016, P75063, P76067, P87	ChrR	1380187	orf19.721	Caa-Taa	Q->*
P75010	ChrR	1403458	orf19.915	Caa-Taa	Q->*
GC75, P57072, P60002, P75010, P75016, P75063, P76055, P76067, P78048, P87, P94015	ChrR	1611872	orf19.6124	Cga-Tga	R->*
P94015	ChrR	1654725	orf19.6288	Cga-Tga	R->*
P57072, P76055, P76067, P87	ChrR	1712567	orf19.612	taC-taG	Y->*
P94015	ChrR	1723829	orf19.610	Cag-Tag	Q->*
P60002, P75010, P94015	ChrR	1734166	orf19.605	Gaa-Taa	E->*
P57072, P76055	ChrR	1882485	orf19.6450	Caa-Tag	Q->*
P37037, P37039	ChrR	1933891	orf19.7301	tgG-tgA	W->*
P75010	ChrR	1936338	orf19.7303	Caa-Taa	Q->*
P76055	ChrR	1951291	orf19.7311	taC-taA	Y->*
P57072, P76067	ChrR	2017707	orf19.7342	Gaa-Taa	E->*
P78048	ChrR	2020370	orf19.7342	Gaa-Taa	E->*
P57072, P76055, P76067	ChrR	2038454	orf19.6606	tgG-tgA	W->*
L26	ChrR	2047777	orf19.6600	taC-taA	Y->*
P34048, P57055, P78042	ChrR	2152191	orf19.7583	Aga-Tga	R->*
GC75, P34048, P57055, P75010, P75016, P75063, P78042, P87, P94015	ChrR	2165430	orf19.7589	Cag-Tag	Q->*
