# Supplementary material for: Genetic and phenotypic intra-species variation in Candida albicans
Source: HighWire-hosted journal article supplement (doi:10.1101/gr.174623.114), 2014-12-11
Supplement: TableS16.xlsx [file TableS16.xlsx]

## Sheet: IndelStopCodons
Table S16. Indel mutations resulting in premature stop codons.
Strain	Chromosome¹	position (nt)	Reference allele	Mutant allele	Orf19 id	Mutation type
P57072, GC75, P76055	Chr1	4117	AC	A	orf19.6113	Truncation
P57055, P87, P94015	Chr1	17286	G	GA	orf19.6100	Truncation
P60002	Chr1	17310	AT	A		Truncation
P75063	Chr1	44951	A	AC	orf19.6078	Truncation
P57072, P34048, P37037, 57055, P60002, P76055, P76067, P78042	Chr1	53159	GT	G	orf19.6072	Truncation
P60002, P76067	Chr1	155490	AT	A	orf19.6025	Truncation
P34048	Chr1	155548	A	ACAAAT		Truncation
P76055	Chr1	162200	GTT	G	orf19.6022	Truncation
P94015	Chr1	226875	TTTGA	T	orf19.3301	Truncation
P94015	Chr1	241623	GC	G	orf19.3307	Truncation
P57072, P76055	Chr1	259195	GT	G	orf19.3320	Truncation
12C, 19F, P57072, GC75, L26, P34048, P37005, P37037, P37039, P57055, P60002, P75010, P75017, P75063, P76055, P76067, P78042, P78048, P87, P94015, SC5314	Chr1	324918	G	GA	orf19.3351	Truncation
P57072, P94015	Chr1	383605	AT	A	orf19.4538	Truncation
P57072, P76067	Chr1	451389	T	TC	orf19.3665	Truncation
P87, P94015	Chr1	483484	T	TG	orf19.3686	Truncation
P94015	Chr1	495173	G	GAA	orf19.3694	Truncation
P57072, P37039, P75010	Chr1	499728	T	TCG	orf19.2926	Truncation
P57055	Chr1	527778	TA	T	orf19.2939	Truncation
P57055, P94015	Chr1	562689	CA	C		Truncation
12C, 19F, P57072, GC75, L26, P37005, P37037, P37039, P57055, P60002, P75010, P75063, P76055, P76067, P78048, P94015	Chr1	584835	G	GA	orf19.2968	Readthrough
P57072, P34048, P60002, P76055, P94015	Chr1	821222	T	TGG		Truncation
P75016, P75063, P87	Chr1	823733	TG	T	orf19.4463	Truncation
P60002	Chr1	826722	TCA	T	orf19.4465	Truncation
19F, P57072, GC75, L26, P34048, P37005, P37037, P37039, P75010, P75016, P75063, P76055, P76067, P78048, P87, P94015	Chr1	833322	CG	C	orf19.4468	Readthrough
19F, L26, P37039, P78048	Chr1	837522	GGTATT	G	orf19.4472	Truncation
P57072, P34048, P57055, P75063, P78042	Chr1	859387	ATT	A	orf19.1041	Truncation
P57055	Chr1	862492	C	CTT	orf19.1043	Truncation
P76055	Chr1	865993	AT	A	orf19.1047	Truncation
P57072	Chr1	881617	A	AAG		Truncation
P57072, GC75, P57055, P60002, P75016, P75063, P76067, P87	Chr1	914297	GAACA	G	orf19.5197	Truncation
P76055	Chr1	1004303	GA	G	orf19.762	Truncation
P76067	Chr1	1011377	A	ATG	orf19.757	Truncation
12C, 19F, GC75, L26, P37005, P37037, P37039, P60002, P75016, P75063, P78048, P87	Chr1	1083932	CA	C	orf19.4056	Readthrough
P57072	Chr1	1083938	AC	A		Readthrough
P57072, L26, P57055, P76055, P76067	Chr1	1133330	AT	A	orf19.434	Truncation
P94015	Chr1	1189482	TA	T		Truncation
P57072	Chr1	1244918	ACC	A	orf19.2454	Truncation
P34048	Chr1	1263375	AGTAT	A	orf19.2445	Truncation
P94015	Chr1	1286348	A	AC	orf19.2431	Truncation
P60002	Chr1	1309682	G	GC	orf19.1824	Truncation
12C, 19F, P57072, L26, P34048, P37005, P37037, P37039, P57055, P60002, P75010, P75016, P75063, P76055, P76067, P78042, P78048, P94015	Chr1	1324524	TAAAAA	T	orf19.1821	Readthrough
P75063, P76067	Chr1	1340478	CA	C	orf19.6280	Truncation
P57055	Chr1	1340700	C	CA		Truncation
P57072, P75063	Chr1	1390604	TG	T	orf19.6260	Truncation
P75010	Chr1	1498259	GC	G	orf19.6202	Truncation
P57072, GC75, L26, P37005, P37039, P75010, P75063, P76055, P78042, P87, P94015	Chr1	1662489	AG	A	orf19.2778	Truncation
P57072, GC75, P60002, P75010, P75016, P75063, P76055, P76067, P87, P94015	Chr1	1923913	G	GA	orf19.4742	Truncation
P60002	Chr1	1951500	C	CAT	orf19.4753	Truncation
19F, P78048	Chr1	1968614	TCC	T	orf19.4760	Truncation
P37037	Chr1	1968969	G	GA		Truncation
P75016, P75063, P87	Chr1	1971213	A	AT	orf19.4761	Truncation
P94015	Chr1	1984274	GA	G	orf19.4766	Truncation
P76055, P76067	Chr1	2075143	TA	T	orf19.4803	Truncation
P75063, P94015	Chr1	2104617	GT	G	orf19.4819	Truncation
P60002	Chr1	2134531	GAT	G	orf19.4834	Truncation
12C, 19F, P57072, GC75, L26, P34048, P37005, P37037, P37039, P57055, P60002, P75010, P75017, P75063, P76055, P76067, P78042, P78048, P87, P94015, SC5314	Chr1	2174238	C	CA	orf19.4862	Readthrough
12C, 19F, P57072, L26, P34048, P37005, P37037, P37039, P57055, P60002, P76055, P76067, P78042, P78048	Chr1	2216489	T	TTC	orf19.4882	Truncation
P75016, P75063	Chr1	2251039	GTT	G	orf19.4890	Truncation
P75063, P87	Chr1	2325761	AC	A	orf19.994	Truncation
P57072, GC75, P34048, P57055, P75010, P75016, P75063, P76055, P78042, P87	Chr1	2349011	A	AT	orf19.1831	Truncation
GC75	Chr1	2386742	AT	A	orf19.2343.1	Truncation
12C, 19F, P57072, GC75, L26, P34048, P37005, P37037, P37039, P57055, P60002, P75010, P75017, P75063, P76055, P76067, P78042, P78048, P87, P94015, SC5314	Chr1	2522413	GT	G	orf19.655	Truncation
P76067	Chr1	2550198	TGG	T	orf19.1158	Truncation
12C, 19F, P57072, GC75, L26, P34048, P37005, P37037, P37039, P57055, P60002, P75010, P75017, P75063, P76055, P76067, P78042, P78048, P87, P94015, SC5314	Chr1	2568587	TA	T	orf19.1146	Readthrough
P34048, P57055, P60002, P75016, P75063, P78042, P87, P94015	Chr1	2632373	GA	G	orf19.5264	Truncation
P57072, P75010, P76055, P76067	Chr1	2632509	AT	A		Readthrough
P57055, P60002, P76067, P78042	Chr1	2684006	G	GA	orf19.5233	Truncation
12C, 19F, P57072, GC75, L26, P34048, P37005, P37037, P37039, P57055, P60002, P75010, P75017, P75063, P76055, P76067, P78042, P78048, P87, P94015, SC5314	Chr1	2700361	AT	A	orf19.5224	Readthrough
P57072, GC75, P34048, P57055, P60002, P75010, P75063, P76055, P76067, P78042, P87, P94015	Chr1	2703500	GAA	G	orf19.5223	Truncation
P75010	Chr1	2718901	CT	C	orf19.69.2	Truncation
P60002	Chr1	2733390	GA	G	orf19.3765	Truncation
P57072, P75010	Chr1	2756016	GTA	G	orf19.6362	Truncation
P76067	Chr1	2779225	A	ACT	orf19.6348	Truncation
P57055, P75010, P78042	Chr1	2780656	T	TGA	orf19.6347	Truncation
P60002	Chr1	2802410	AC	A	orf19.4916	Truncation
L26, P37005, P37037, P37039, P94015	Chr1	2802523	TG	T	orf19.4917	Truncation
12C, 19F, L26, P34048, P37005, P37037, P37039, P57055, P78042, P78048	Chr1	2806960	TG	T	orf19.4919	Truncation
P76055, P94015	Chr1	2853758	GA	G	orf19.4936	Truncation
P37037	Chr1	2853796	AT	A		Truncation
P57072, P34048, P57055, P75010, P76067, P78042	Chr1	2853971	TA	T		Truncation
P57072, P76055, P76067	Chr1	2883188	C	CTT	orf19.4949	Truncation
P94015	Chr1	2899488	C	CTT	orf19.4956	Truncation
P34048	Chr1	2951422	C	CA	orf19.4976	Truncation
12C, 19F, P57072, GC75, P37037, P75016, P75063, P76055, P87	Chr1	2951524	A	AT		Truncation
P60002	Chr1	2951527	T	TA		Truncation
19F, P57072, L26, P37037, P76055, P76067, P94015	Chr1	2964560	A	AT	orf19.4984	Truncation
12C, 19F, P57072, GC75, L26, P34048, P37005, P37037, P37039, P57055, P60002, P75010, P75017, P75063, P76055, P76067, P78042, P78048, P87, P94015, SC5314	Chr1	2979133	AC	A	orf19.4991	Readthrough
12C, 19F, L26, P37005, P37039, P57055, P60002, P75010, P75016, P75063, P76055, P76067, P78048, P87, P94015	Chr1	2986344	GA	G	orf19.4995	Truncation
P76055	Chr1	3037968	C	CT	orf19.5020	Truncation
P34048	Chr1	3091358	C	CT	orf19.7212	Truncation
P37037	Chr1	3091358	C	CT	orf19.7257	Truncation
P75063	Chr1	3169666	AT	A		Truncation
GC75, P60002, P87, P94015	Chr1	3169686	CA	C		Truncation
P34048, P57055, P78042	Chr1	3169686	CAA	C		Truncation
P57055, P78042, P94015	Chr1	3183394	GCC	G	orf19.7274	Truncation
19F	Chr1	3183970	C	CA		Truncation
P57072, L26, P37039	Chr1	3183970	CT	C		Truncation
P78042	Chr1	3184615	T	TA	orf19.7275	Truncation
P60002, P78042, P94015	Chr1	3185784	GT	G	orf19.7277	Truncation
GC75, P34048, P57055, P60002, P75016, P75063, P76067, P87, P94015	Chr2	18912	C	CT	orf19.1906	Truncation
12C, 19F, P57072, GC75, P34048, P37005, P37037, P37039, P57055, P60002, P75010, P75016, P75063, P76067, P78042, P78048, P87, P94015	Chr2	44795	G	GC	orf19.2097	Truncation
P78042	Chr2	110856	GT	G	orf19.2061	Truncation
P57072, L26, P75010, P76055, P76067, P78042	Chr2	161695	GTT	G	orf19.2025	Truncation
12C, 19F, P57072, L26, P34048, P37005, P37037, P37039, P57055, P75010, P75016, P75063, P76055, P76067, P87042, P78048, P87, P94015	Chr2	163168	AT	A	orf19.2024	Truncation
12C	Chr2	198221	T	TG	orf19.2005	Truncation
P98	Chr2	209834	TAC	T	orf19.2000	Truncation
P75016	Chr2	223843	AG	A	orf19.1994	Truncation
P34048, P78042	Chr2	237480	CTT	C	orf19.1441	Truncation
P75063	Chr2	237481	T	TCC		Truncation
P57055, P60002, P94015	Chr2	270656	GA	G	orf19.1456	Truncation
GC75, P75016	Chr2	322891	GTT	G	orf19.1488	Truncation
P57072	Chr2	356511	TA	T	orf19.1502	Truncation
12C, P57072, GC75, P37005, P37037, P37039	Chr2	367347	TGG	T	orf19.1508	Truncation
P34048, P57055, P75016, P76067, P87	Chr2	367347	TG	T		Truncation
19F, P57072, P37039, P75063, P76055, P78048, P87	Chr2	418988	TA	T	orf19.1530	Truncation
12C, P37005, P37037	Chr2	420916	TTA	T	orf19.1531	Truncation
P34048, P57055, P76067, P78042	Chr2	462125	AC	A	orf19.1551	Truncation
P34048, P57055, P75016, P76067, P78042	Chr2	517791	G	GT	orf19.1581	Truncation
P57072, GC75, P60002, P75016, P75063, P76055, P76067, P87	Chr2	537422	G	GTT	orf19.5840	Truncation
12C, 19F, P57072, GC75, L26, P34048, P37005, P37037, P37039, P57055, P60002, P75010, P75017, P75063, P76055, P76067, P78042, P78048, P87, P94015, SC5314	Chr2	568472	C	CA	orf19.5821	Truncation
GC75, P37039, P60002, P75010, P75016, P75063, P87	Chr2	693177	GA	G	orf19.894	Truncation
P78042	Chr2	724970	T	TC	orf19.873	Truncation
GC75	Chr2	802976	CAT	C	orf19.841	Truncation
P76067	Chr2	813491	GAA	G	orf19.835	Truncation
P75016, P76055, P76067	Chr2	919492	G	GAA	orf19.4515	Truncation
P34048	Chr2	933319	TATAGA	T	orf19.4506	Truncation
P57072	Chr2	980299	TTC	T	orf19.149	Truncation
P75010	Chr2	980315	T	TTC		Truncation
P76067	Chr2	1014566	AT	A	orf19.4127	Truncation
P34048, P87	Chr2	1084233	C	CA	orf19.3555	Truncation
P60002, P76067	Chr2	1238833	G	GC	orf19.4115	Truncation
P34048, P78042, P94015	Chr2	1269545	C	CA	orf19.5495	Truncation
P76067	Chr2	1269545	C	CAA		Truncation
12C, 19F, P57072, GC75, L26, P34048, P37005, P37037, P37039, P57055, P60002, P75010, P75017, P75063, P76055, P76067, P78042, P78048, P87, P94015, SC5314	Chr2	1277591	T	TG	orf19.5491	Truncation
GC75, P75010, P75016, P75063, P76067, P78048, P87	Chr2	1345203	T	TTGA	orf19.35.1	Truncation
P78042	Chr2	1365310	CA	C	orf19.1224	Truncation
P75016	Chr2	1439369	TCT	T	orf19.2258	Truncation
P76067	Chr2	1443896	GCC	G	orf19.2262	Truncation
GC75, P34048, P57055, P75063	Chr2	1511591	C	CA	orf19.1893	Truncation
	Chr2	1589329	A	AT	orf19.2203	Truncation
12C, 19F, P57072, GC75, L26, P34048, P37005, P37037, P37039, P57055, P60002, P75010, P75017, P75063, P76055, P76067, P78042, P78048, P87, P94015, SC5314	Chr2	1671686	GC	G	orf19.2222	Readthrough
P75010, P87	Chr2	1677070	T	TTG	orf19.1353	Truncation
12C, GC75, L26, P34048, P37005, P75063, P78042	Chr2	1679332	CT	C	orf19.1351	Truncation
P57072, GC75, P34048, P57055, P75010, P75063, P76055, P76067, P78042, P78048, P87, P94015	Chr2	1794306	TA	T	orf19.3586	Truncation
P57072, P76067	Chr2	1840079	AT	A	orf19.204	Truncation
P57072, P60002, P75016, P76055, P76067, P87	Chr2	1889524	G	GAA	orf19.4081	Truncation
P34048, P57055, P78042	Chr2	1889582	AGG	A		Truncation
P57072, P57055, P76055, P76067, P78042	Chr2	1892696	TG	T	orf19.4085	Truncation
P87	Chr2	1898094	T	TG		Truncation
P57072, GC75, P34048, P57055, P60002, P75010, P75016, P75063, P76055, P76067, P78042, P87, P94015	Chr2	1903228	CT	C	orf19.4094	Truncation
P57072, GC75, P34048, P57055, P75016, P75063, P76055, P76067, P78042, P87	Chr2	1999480	C	CAA	orf19.1371	Truncation
P75010, P87	Chr2	2003372	A	AT	orf19.1369	Truncation
12C, 19F, L26, P37005, P37037, P37039, P78048	Chr2	2016391	G	GT	orf19.1365	Truncation
P34048, P76055	Chr2	2056287	A	AT	orf19.1778	Truncation
GC75, P57055, P60002, P75010, P75016, P75063, P87, P94015	Chr2	2056332	CTCTA	C		Truncation
P76067	Chr2	2056526	T	TCC		Truncation
12C, 19F, P57072, GC75, L26, P34048, P37005, P37037, P37039, P57055, P60002, P75010, P75017, P75063, P76055, P76067, P78042, P78048, P87, P94015, SC5314	Chr2	2065283	A	AT	orf19.1774	Truncation
P57072	Chr2	2093797	T	TTC	orf19.1763	Truncation
12C, 19F, P57072, GC75, L26, P34048, P37005, P37037, P37039, P57055, P60002, P75010, P75017, P75063, P76055, P76067, P78042, P78048, P87, P94015, SC5314	Chr2	2129426	AG	A	orf19.1745	Readthrough
P57055, P60002	Chr2	2227543	CA	C	orf19.5370	Truncation
12C, 19F, P57072, GC75, L26, P37005, P37037, P37039, P75010, P75016, P75063, P78048, P87, P94015	Chr3	4904	CA	C	orf19.5469	Truncation
GC75	Chr3	40567	G	GTT	orf19.5440	Truncation
P57055, P60002	Chr3	40575	T	TTC		Truncation
P75010	Chr3	109129	AT	A	orf19.5391	Truncation
P57072, P78042	Chr3	174520	TTC	T	orf19.6164	Truncation
P87	Chr3	229322	C	CCT	orf19.2515	Truncation
12C	Chr3	229670	T	TG		Truncation
12C, L26, P37005	Chr3	231824	AGG	A	orf19.2516	Truncation
P57072, P60002, P94015	Chr3	275515	G	GGA	orf19.1722	Truncation
P75010	Chr3	275515	GGA	G		Truncation
P75010	Chr3	288233	AT	A	orf19.1717	Truncation
P57072, GC75, P75063, P76055, P94015	Chr3	302295	T	TGG	orf19.1711	Truncation
GC75, L26, P76067	Chr3	349093	TG	T	orf19.1685	Truncation
P75063	Chr3	373296	T	TCA	orf19.1672	Truncation
P75010	Chr3	441601	TA	T	orf19.1648	Truncation
GC75, P75016, P75063, P87	Chr3	474859	G	GAA	orf19.1624.1	Truncation
P60002	Chr3	526722	G	GGA	orf19.227	Truncation
P57072, P76055, P76067	Chr3	526805	TC	T		Truncation
P75010, P76055	Chr3	562065	G	GAA	orf19.248	Truncation
12C, 19F, P57072, GC75, L26, P34048, P37005, P37037, P37039, P57055, P60002, P75010, P75017, P75063, P76055, P76067, P78042, P78048, P87, P94015, SC5314	Chr3	570276	A	AT	orf19.255	Readthrough
P75010, P76055	Chr3	573113	C	CA	orf19.257	Truncation
12C, 19F, P57072, GC75, L26, P34048, P37005, P37037, P37039, P57055, P60002, P75010, P75017, P75063, P76055, P76067, P78042, P78048, P87, P94015, SC5314	Chr3	595766	TG	T	orf19.267	Truncation
12C, 19F, P57072, GC75, L26, P34048, P37005, P37037, P37039, P57055, P60002, P75010, P75017, P75063, P76055, P76067, P78042, P78048, P87, P94015, SC5314	Chr3	601373	AG	A	orf19.269	Truncation
GC75, P34048, P75016, P75063, P78042	Chr3	639542	AT	A	orf19.298	Truncation
P57072, P34048, P57055, P75010, P75016, P76055, P76067, P78042, P87, P94015	Chr3	654389	GA	G	orf19.304	Truncation
GC75	Chr3	684774	G	GAA	orf19.322	Truncation
P75010	Chr3	688571	AT	A	orf19.323	Truncation
12C	Chr3	765841	AT	A	orf19.6957	Truncation
P75016, P75063, P87	Chr3	836855	TCA	T	orf19.2808	Truncation
P60002, P75010	Chr3	975797	T	TG	orf19.5918	Truncation
P57072, P60002, P76055	Chr3	1072547	GA	G	orf19.5966	Truncation
GC75, P87	Chr3	1102761	GT	G	orf19.5987	Truncation
P76055	Chr3	1170190	G	GAT	orf19.6966	Truncation
P60002	Chr3	1299977	CACA	C	orf19.7361	Truncation
P75063	Chr3	1395470	G	GCA	orf19.7394	Truncation
GC75, P75016, P75063, P76067, P87, P94015	Chr3	1395975	A	AT	orf19.7395	Truncation
P57072	Chr3	1398290	A	AC		Truncation
12C, 19F, P57072, GC75, L26, P34048, P37005, P37037, P37039, P57055, P60002, P75010, P75017, P75063, P76055, P76067, P78042, P78048, P87, P94015, SC5314	Chr3	1454869	CT	C	orf19.7421	Readthrough
12C, 19F, L26, P37005, P37037, P37039, P78048	Chr3	1493774	AT	A	orf19.7443	Truncation
P78042	Chr3	1508423	TAA	T		Truncation
12C, 19F, P57072, GC75, L26, P34048, P37005, P37037, P37039, P57055, P60002, P75010, P75016, P75063, P76055, P76067, P78042, P78048, P87, P94015	Chr3	1517617	C	CA	orf19.7452	Readthrough
12C, 19F, P57072, GC75, L26, P34048, P37005, P37037, P37039, P57055, P60002, P75010, P75017, P75063, P76055, P76067, P78042, P78048, P87, P94015, SC5314	Chr3	1533235	AC	A	orf19.6832	Truncation
12C, 19F, P57072, GC75, L26, P34048, P37005, P37037, P37039, P57055, P60002, P75010, P75017, P75063, P76055, P76067, P78042, P78048, P87, P94015, SC5314	Chr3	1732148	G	GC	orf19.6734	Truncation
12C, 19F, P57072, GC75, L26, P34048, P37005, P37037, P37039, P57055, P60002, P75010, P75017, P75063, P76055, P76067, P78042, P78048, P87, P94015, SC5314	Chr3	1741835	GT	G	orf19.6724	Truncation
12C, 19F, P57072, L26, P34048, P37005, P37037, P37039, P57055, P60002, P75010, P75016, P75063, P76055, P78042, P87, P94015	Chr3	1767948	AG	A	orf19.6170	Readthrough
P60002, P75010	Chr3	1782369	A	AAT	orf19.6186	Truncation
GC75	Chr4	34840	A	AT	orf19.5648	Truncation
19F, P57072, GC75, L26, P34048, P57055, P60002, P75010, P75016, P75063, P76055, P76067, P78042, P87	Chr4	166740	AT	A	orf19.4703	Truncation
19F, L26, P60002	Chr4	169391	ATAAG	A	orf19.4701	Truncation
GC75, P87	Chr4	199830	GAA	G	orf19.4688	Truncation
P57055, P76055	Chr4	230924	CT	C	orf19.4676	Truncation
19F, P57072, GC75, P57055, P76055	Chr4	240547	ATTTC	A	orf19.4672	Truncation
P57072	Chr4	284255	A	AG	orf19.4649	Truncation
P57072, GC75, P34048, P57055, P60002, P75016, P75063, P76055, P76067, P78042, P87, P94015	Chr4	291506	AC	A	orf19.4646	Truncation
19F, P57072, GC75, P34048, P57055, P60002, P75010, P76055, P76067, P78042, P94015	Chr4	291725	G	GGC		Truncation
P37037, P78042	Chr4	309866	CT	C	orf19.4636	Truncation
P76055, P76067	Chr4	479769	G	GA	orf19.2766	Truncation
P34048, P60002	Chr4	500088	C	CTAA	orf19.2754	Truncation
P75010	Chr4	500089	TGA	T		Truncation
19F, L26, P37037, P60002	Chr4	567014	A	AT	orf19.2725	Truncation
P57072, P34048, P37037, P57055, P60002, P76055, P76067, P78042, P94015	Chr4	635719	A	AT	orf19.2686	Truncation
P57072, GC75, P37037, P60002, P75010, P75016, P75063, P76055, P76067, P87, P94015	Chr4	644263	C	CG	orf19.2684	Truncation
P34048, P57055, P78042	Chr4	679543	T	TA	orf19.2668	Truncation
L26	Chr4	708755	G	GT	orf19.3365	Truncation
P57072, P34048, P37037, P60002, P76055, P76067	Chr4	713575	C	CT	orf19.3368	Truncation
GC75, P37005, P75016, P75063, P87	Chr4	751821	GC	G	orf19.1326	Truncation
12C, 19F, P57072, GC75, L26, P34048, P37005, P37037, P37039, P57055, P60002, P75010, P75063, P76055, P76067, P78042, P78048, P87, P94015	Chr4	837015	AG	A	orf19.789.1	Readthrough
L26	Chr4	876949	A	AG	orf19.5300	Truncation
P57072	Chr4	972260	AT	A	orf19.3829	Truncation
P94015	Chr4	972260	A	AT		Truncation
P57072, GC75, P60002, P75010, P75016, P75063, P76067, P87, P94015	Chr4	1060407	TCC	T	orf19.3784	Truncation
P87	Chr4	1090201	T	TC	orf19.7361	Truncation
GC75	Chr4	1118112	ATG	A	orf19.746	Truncation
P75016, P78048	Chr4	1172746	A	AGT	orf19.1795	Truncation
P78048	Chr4	1233542	TA	T	orf19.1244	Truncation
P94015	Chr4	1235826	A	AT	orf19.1246	Truncation
P76055	Chr4	1235832	CT	C		Truncation
19F, P37005, P75010	Chr4	1287468	GA	G	orf19.1266	Truncation
P75010	Chr4	1290877	CT	C	orf19.1268	Truncation
P57055, P75010	Chr4	1334540	T	TG	orf19.4411	Truncation
P75010	Chr4	1430142	TCC	T	orf19.2891	Truncation
P60002, P87	Chr4	1431005	GT	G		Truncation
P57055, P87	Chr4	1437004	GT	G	orf19.2887	Truncation
P57072, P57055, P75010, P76055, P76067, P78048	Chr4	1460489	TA	T	orf19.2881	Truncation
P57072, P57055, P75010, P78048, P37005, P75063, P76055, P87	Chr4	1495390	C	CT	orf19.3140	Truncation
P94015	Chr4	1502990	A	AT	orf19.3134	Truncation
GC75, P60002, P75016, P75063, P87	Chr4	1537029	GC	G	orf19.3121	Truncation
P60002	Chr4	1584044	ATT	A	orf19.3088	Truncation
P75016, P75063, P87	Chr5	11568	GA	G	orf19.5688	Truncation
P57072, P75063, P87	Chr5	77142	C	CT	orf19.948	Truncation
P34048, P57055, P60002, P75016, P78042, P94015	Chr5	77325	CT	C		Truncation
P34048	Chr5	103906	C	CAA	orf19.938	Truncation
12C, 19F, P57072, GC75, L26, P34048, P37005, P37037, P37039, P57055, P60002, P75016, P75063, P76055, P76067, P78042, P78048, P87, P94015	Chr5	105073	GTT	G	orf19.937	Truncation
P34048, P75010, P75063, P76055, P94015	Chr5	196855	G	GA	orf19.587	Truncation
P76055, P76067, P78042, P94015	Chr5	254881	G	GT	orf19.1958	Truncation
12C, 19F, P37005, P57072, GC75, L26, P34048, P37039, P57055, P60002, P75010, P75016, P75063, P87	Chr5	254925	GT	G		Truncation
P57072, GC75, P34048, P57055, P60002, P75010, P75016, P75063, P76055, P76067, P78042, P87, P94015	Chr5	297064	AT	A	orf19.1935	Truncation
P57072, P76055	Chr5	343772	A	AC	orf19.4149	Truncation
P75063	Chr5	343864	GATAT	G		Truncation
19F	Chr5	424674	AG	A	orf19.3186	Truncation
P78042, P94015	Chr5	430873	TAAAAA	T	orf19.3180	Truncation
P34048, P57055, P75010, P78042	Chr5	511630	C	CA	orf19.4239	Truncation
P57072, L26, P34048, P37039, P57055, P75010, P75063, P78048	Chr5	524895	AT	A	orf19.4244	Truncation
12C, 19F, P57072, GC75, L26, P34048, P37005, P37037, P37039, P57055, P60002, P75010, P75017, P75063, P76055, P76067, P78042, P78048, P87, P94015, SC5314	Chr5	524948	TC	T		Readthrough
P57072, GC75, P34048, P57055, P60002, P75010, P75016, P75063, P76055, P76067, P78042, P87, P94015	Chr5	557646	T	TG	orf19.4262	Truncation
P60002	Chr5	563824	GAA	G	orf19.4264	Truncation
P60002	Chr5	567938	T	TG	orf19.4266	Truncation
P76055	Chr5	607044	TG	T	orf19.4287	Truncation
19F, P34048, P57055, P78042	Chr5	641210	TC	T	orf19.4310	Truncation
P76055, P76067	Chr5	654986	T	TC	orf19.4321	Readthrough
GC75, P34048, P37039, P57055, P60002, P75016, P75063, P78042, P87	Chr5	655377	AGT	A		Truncation
P34048, P37039, P57055, P60002, P78042	Chr5	740161	T	TTAG	orf19.2653	Truncation
P76055, P76067	Chr5	748977	TGG	T	orf19.2649	Truncation
P75010	Chr5	755699	CTTTG	C	orf19.2647	Truncation
GC75, P60002, P75016, P75063, P76055, P76067, P87	Chr5	760727	AT	A	orf19.2645	Truncation
12C, 19F, P57072, GC75, L26, P34048, P37005, P37037, P37039, P57055, P60002, P75010, P75017, P75063, P76055, P76067, P78042, P78048, P87, P94015, SC5314	Chr5	798419	C	CA	orf19.6668	Truncation
P60002	Chr5	823820	CAA	C	orf19.1123	Truncation
GC75, P76067	Chr5	855477	T	TA	orf19.1105.3	Truncation
P75010, GC75, P34048, P37039, P57055, P60002, P75016, P75063, P78042, P87, P94015	Chr5	896503	G	GA	orf19.1286	Truncation
P75010	Chr5	937244	AT	A	orf19.3904	Truncation
P60002	Chr5	937799	AG	A		Truncation
P75010	Chr5	941290	G	GA		Truncation
P57055, P78042	Chr5	983202	G	GA	orf19.3934	Truncation
P60002	Chr5	1002153	AG	A	orf19.3945	Truncation
12C, 19F, GC75, L26, P34048, P37037, P57055, P60002, P75010, P75016, P75063, P78042, P78048, P87, P94015	Chr5	1024407	T	TA	orf19.3957	Truncation
P57072, GC75, P75016, P75063, P76055, P76067, P87	Chr5	1051842	AT	A	orf19.3968	Truncation
P75010	Chr5	1051842	A	AT		Truncation
GC75, P34048, P57055, P60002, P75016, P75063, P76055, P76067, P87	Chr5	1102475	C	CA	orf19.3994	Truncation
P57072, P76067	Chr5	1176458	C	CA	orf19.4046	Truncation
P75010	Chr5	1176467	AT	A		Truncation
P75063, P87, P94015	Chr5	1189038	AT	A	orf19.4055	Truncation
P60002	Chr6	3852	A	AT	orf19.6338	Truncation
12C	Chr6	3852	A	AT	orf19.6319	Truncation
12C, GC75, L26, P37005, P37037, P37039, P60002, P75010, P75016, P75063, P76055, P76067, P78042, P94015	Chr6	19388	C	CT		Truncation
P60002	Chr6	22860	G	GAA	orf19.1177	Readthrough
12C, 19F, P57072, L26, P34048, P37005, P37039, P57055, P60002, P75010, P75063, P78042, P94015	Chr6	24919	CT	C	orf19.1181	Truncation
P94015	Chr6	24962	CA	C		Truncation
L26	Chr6	63352	C	CA	orf19.1196	Truncation
P87	Chr6	71864	TG	T	orf19.1203	Truncation
P76067	Chr6	107688	TA	T	orf19.4200	Truncation
P94015	Chr6	107688	T	TA		Truncation
12C, 19F, GC75, L26, P37005, P37039, P60002, P75010, P75016, P75063, P87, P94015	Chr6	111409	CG	C	orf19.4196	Truncation
P76055	Chr6	180107	TTG	T	orf19.92	Truncation
12C, 19F, L26, P34048, P37005, P37039, P76067, P78048	Chr6	193021	TC	T	orf19.99	Truncation
P37037, P78048	Chr6	199107	AC	A	orf19.103	Truncation
P37037, P78048	Chr6	199315	AT	A	orf19.104	Truncation
P37037, P76055, P94015	Chr6	213057	TA	T	orf19.115	Truncation
P37037, P76055, P76067, P78048, P94015	Chr6	213075	GT	G		Truncation
12C, 19F, P57072, GC75, L26, P34048, P37005, P37037, P37039, P57055, P60002, P75010, P75017, P75063, P76055, P76067, P78042, P78048, P87, P94015, SC5314	Chr6	238504	TA	T	orf19.132	Truncation
P94015	Chr6	244311	A	AT	orf19.134	Truncation
19F, P57072, L26, P37005, P37039, P60002, P76067, P78048	Chr6	244516	TA	T		Truncation
P57072, P57055, P60002	Chr6	270311	TA	T	orf19.3449	Truncation
12C, 19F, P57072, L26, P37037, P37039, P75010, P76055, P76067	Chr6	272717	CT	C	orf19.3448	Truncation
12C, 19F, P57072, GC75, L26, P34048, P37005, P37037, P37039, P57055, P60002, P75010, P75017, P75063, P76055, P76067, P78042, P78048, P87, P94015, SC5314	Chr6	298273	GC	G	orf19.3434	Truncation
P76067	Chr6	323202	C	CTT	orf19.3429	Truncation
P75063, P87	Chr6	348497	T	TAA	orf19.3420	Truncation
P37005	Chr6	348497	T	TA		Truncation
P37037	Chr6	416551	AC	A	orf19.3508	Truncation
P60002	Chr6	572437	T	TCG	orf19.5551	Truncation
12C, 19F, GC75, L26, P34048, P37005, P37039, P60002, P75010, P75016, P75063, P87, P94015	Chr6	576949	T	TAA	orf19.5553	Truncation
P57072, P34048, P57055, P60002, P75010, P76055, P76067, P78042, P94015	Chr6	582984	GAA	G	orf19.5556	Truncation
P34048	Chr6	646562	GAA	G	orf19.5589	Truncation
19F, L26, P37005, P37039, P94015	Chr6	704852	A	ATT	orf19.5623	Truncation
P87	Chr6	704852	A	AT		Truncation
19F, L26, P37039, P94015	Chr6	740151	GT	G	orf19.5713	Truncation
GC75, L26, P37039, P57055, P60002, P75010, P75063, P76067	Chr6	808320	A	ACG	orf19.5747	Truncation
12C, 19F, P57072, GC75, L26, P34048, P37005, P37037, P37039, P57055, P60002, P75010, P75017, P75063, P76055, P76067, P78042, P78048, P87, P94015, SC5314	Chr6	880990	TA	T	orf19.1219	Truncation
GC75	Chr6	910181	GA	G	orf19.4553	Truncation
12C, 19F, P57072, P75063, P76067, P78042, P78048	Chr6	910193	T	TG		Truncation
GC75, P75016, P75063, P87	Chr6	924924	TGG	T	orf19.1075	Truncation
GC75	Chr6	924927	TG	T		Truncation
P75010	Chr6	949584	C	CAA	orf19.1086	Truncation
12C, 19F, P57072, GC75, L26, P34048, P37005, P37037, P37039, P57055, P60002, P75010, P75017, P75063, P76055, P76067, P78042, P78048, P87, P94015, SC5314	Chr6	959133	GT	G	orf19.1093	Truncation
P57072, P34048, P57055, P76055, P76067, P78042	Chr6	986124	CCCTT	C	orf19.2125	Truncation
12C, 19F, P57072, GC75, P37--5, P37037, P60002, P75010, P75016, P75063, P76067, P78042, P87, P94015	Chr6	991445	TA	T	orf19.2129	Truncation
P34048, P76055	Chr6	991451	CG	C		Truncation
P75063, P76055, P76067, P78042, P87	Chr7	9225	GAA	G	orf19.7115	Truncation
GC75, P34048, P75010, P75016, P75063, P87, P94015	Chr7	30632	G	GAA	orf19.7102	Truncation
P75010, P75063	Chr7	62253	T	TA	orf19.7082	Truncation
GC75, P57055, P75016, P75063, P87	Chr7	106606	CT	C	orf19.7055	Truncation
P57072, P75063, P76067	Chr7	114161	AC	A	orf19.7054	Truncation
P34048, P37037, P57055	Chr7	114373	TAC	T		Truncation
P34048, P57055, P75010, P76067, P78042, P94015	Chr7	153241	TG	T	orf19.7038	Truncation
P76067	Chr7	178938	T	TGG	orf19.7027	Truncation
P57055, P76067, P78042	Chr7	189867	AT	A	orf19.7024	Truncation
P57072	Chr7	214742	GAA	G	orf19.7012	Truncation
P94015	Chr7	231123	AT	A	orf19.6896	Truncation
P87	Chr7	286005	ATT	A	orf19.6920	Truncation
P57072, GC75, P75010, P75016, P75063, P76055, P76067, P87, P94015	Chr7	351035	A	AT	orf19.6562	Truncation
P34048, P57055, P78042	Chr7	364475	CAT	C	orf19.6556	Truncation
GC75	Chr7	379321	CGGGG	C	orf19.6547	Truncation
GC75, P75010	Chr7	471727	ATT	A	orf19.6500	Truncation
GC75, P60002, P75010, P75016, P75063, P87	Chr7	486846	GA	G	orf19.6491	Truncation
P87	Chr7	500688	G	GAA	orf19.6480	Truncation
P34048	Chr7	504993	TAA	T	orf19.6479	Truncation
12C, 19F, GC75, L26, P37005, P37037, P37039, P75010, P75016, P75063, P78048, P87, P94015	Chr7	526782	AC	A	orf19.6465	Truncation
12C, 19F, P37005, P37037, P37039, P57055, P60002, P75010, P75016, P75063, P78042, P78048, P87, P94015	Chr7	559896	AC	A	orf19.2371	Truncation
P76055	Chr7	569699	ATG	A		Truncation
P76055	Chr7	614945	CATGTT	C	orf19.5177	Truncation
P57072, GC75, L26, P60002, P75010, P75016, P75063, P76055, P76067, P87	Chr7	692565	CT	C	orf19.5137	Truncation
P34048, P57055, P78042	Chr7	692628	AT	A		Truncation
P76055	Chr7	697601	C	CAGT	orf19.5133	Truncation
12C, 19F, P57072, GC75, L26, P34048, P37005, P37037, P37039, P57055, P60002, P75010, P75017, P75063, P76055, P76067, P78042, P78048, P87, P94015, SC5314	Chr7	711780	T	TG	orf19.5126	Readthrough
P34048, P57055, P78042	Chr7	765916	AACG	A	orf19.6704	Truncation
P78042	Chr7	771946	C	CAT	orf19.6705	Truncation
P75016	Chr7	807956	A	AC	orf19.6694	Truncation
GC75, P75010, P75063, P76067	Chr7	829561	T	TCA	orf19.5505	Truncation
P37005, P76055	Chr7	851885	T	TCA	orf19.7197	Truncation
L26	Chr7	856182	T	TC	orf19.7194	Truncation
P34048	Chr7	856936	GA	G		Truncation
GC75, L26, P37005, P60002, P75016, P75063, P78048, P87, P94015	Chr7	860028	GTT	G	orf19.7192	Truncation
L26, P37005, P78048	Chr7	866494	TG	T	orf19.7185	Truncation
P57072, P76055, P76067, P94015	Chr7	934929	ATC	A	orf19.7136	Truncation
P57072, P76055, P76067	ChrR	16788	G	GTTGTT	orf19.7538	Truncation
L26, P78048	ChrR	21453	T	TA	orf19.7534	Truncation
P87	ChrR	21468	AT	A		Truncation
19F	ChrR	21488	C	CT		Truncation
P57072, P76067, P87	ChrR	129430	G	GA	orf19.7480	Truncation
GC75, P75063	ChrR	129430	G	GAA		Truncation
P57055	ChrR	129894	T	TG		Truncation
P57072, P76067	ChrR	143474	GAA	G	orf19.7473	Truncation
GC75, P75063	ChrR	148530	TCA	T	orf19.7472	Truncation
19F, P57072, GC75, L26, P34048, P57055, P75016, P75063, P76055, P76067, P78042, P87	ChrR	151245	T	TC	orf19.7469	Truncation
P60002	ChrR	163738	T	TAAAA	orf19.7464	Truncation
P94015	ChrR	168793	TG	T		Truncation
12C, 19F, P57072, GC75, L26, P34048, P37005, P37037, P37039, P57055, P60002, P75010, P75017, P75063, P76055, P76067, P78042, P78048, P87, P94015, SC5314	ChrR	168855	T	TA	orf19.3286	Truncation
P60002, P76067	ChrR	269184	TCC	T	orf19.3238	Truncation
P34048, P57055, P76055	ChrR	290815	G	GTA	orf19.3231	Truncation
P60002	ChrR	299738	G	GAGAA	orf19.3229	Truncation
P75016, P87	ChrR	299771	C	CA		Truncation
12C, 19F, P57072, GC75, L26, P34048, P37005, P37037, P37039, P57055, P60002, P75010, P75017, P75063, P76055, P76067, P78042, P78048, P87, P94015, SC5314	ChrR	338141	GC	G	orf19.2529.1	Readthrough
12C, P94015	ChrR	340678	T	TTC	orf19.2530	Truncation
P57072, GC75, P75016, P76067, P87	ChrR	340678	T	TTCTC		Truncation
P75010, P94015	ChrR	349345	G	GA	orf19.2537	Truncation
P76067, P87	ChrR	349345	G	GAA		Truncation
19F, P37039	ChrR	351061	A	ATG	orf19.2538	Truncation
19F, P57072, GC75, P57055, P76055, P76067	ChrR	353240	GA	G	orf19.2539	Truncation
12C, 19F, P57072, GC75, L26, P34048, P37005, P37037, P37039, P57055, P60002, P75010, P75017, P75063, P76055, P76067, P78042, P78048, P87, P94015, SC5314	ChrR	355988	TAA	T	orf19.2540	Truncation
P76067	ChrR	415469	A	AC	orf19.2583	Truncation
P87	ChrR	419222	TAG	T	orf19.2585	Truncation
19F, P57072, L26, P34048, P37039, P57055, P76055, P76067, P78042, P94015	ChrR	419364	CGT	C		Truncation
GC75, P75016, P87	ChrR	548262	GT	G	orf19.3719	Truncation
P60002, 19F, L26, P34048, P37039, P57055, P75010, P75063, P78042, P94015	ChrR	548617	C	CA		Truncation
19F, L26	ChrR	623238	CTT	C	orf19.2831	Truncation
P57072, P76067	ChrR	686765	AAG	A	orf19.2859	Truncation
P94015	ChrR	686808	CT	C		Truncation
P76067	ChrR	711716	AGC	A	orf19.2410	Truncation
19F, P57072, GC75, P34048, P57055, P60002, P75016, P76067	ChrR	727238	C	CTT	orf19.2399	Truncation
P94015	ChrR	758068	T	TC	orf19.2379	Truncation
P87, P94015	ChrR	814736	GT	G	orf19.4365	Truncation
12C, 19F, P57072, GC75, L26, P34048, P37005, P37037, P37039, P57055, P60002, P75010, P75017, P75063, P76055, P76067, P78042, P78048, P87, P94015, SC5314	ChrR	977385	GAA	G	orf19.529.1	Readthrough
P76055	ChrR	1018516	A	AG	orf19.1737	Truncation
P57072	ChrR	1049409	T	TTGC	orf19.6309	Truncation
P57072	ChrR	1058755	T	TCA	orf19.6304	Truncation
P57072	ChrR	1065741	T	TA	orf19.1804	Truncation
12C, L26, P34048, P57055, P75010, P76067, P78042, P94015	ChrR	1081913	T	TC	orf19.653	Truncation
P34048, P75010, P94015	ChrR	1091664	A	AC	orf19.647.3	Truncation
GC75, P75-16, P75063, P87	ChrR	1091834	A	AG		Truncation
P75010, P78042, P94015	ChrR	1129586	GT	G	orf19.642	Truncation
GC75, P75016, P87	ChrR	1132181	C	CTTTT	orf19.559	Truncation
P75010, P78042, P94015	ChrR	1133182	TG	T	orf19.562	Truncation
P57072, P34048, P76055, P76067	ChrR	1137313	C	CA	orf19.1009	Truncation
GC75, P75016, P75063, P87	ChrR	1146166	C	CTT	orf19.5289	Truncation
GC75, P75016, P75063, P87	ChrR	1160223	GCA	G	orf19.5284	Truncation
L26	ChrR	1208679	GA	G	orf19.6644	Truncation
GC75, P87, P94015	ChrR	1208708	A	AGG		Truncation
P57072, P75016, P75063, P76067, P94015	ChrR	1208855	AT	A		Readthrough
P76067, P94015	ChrR	1316000	CAAAAT	C	orf19.3868	Truncation
P60002, P94015	ChrR	1340910	T	TC	orf19.3886	Truncation
P34048, P57055, P78042, P94015	ChrR	1346271	TG	T	orf19.3888.2	Truncation
P76055, P76067, P94015	ChrR	1488754	G	GC	orf19.2370	Truncation
P57072	ChrR	1488756	T	TG		Truncation
12C, 19F, GC75, L26, P34048, P37005, P37037, P37039, P57055, P75010, P75016, P75063, P78042, P78048	ChrR	1624406	GA	G	orf19.6116	Truncation
12C, 19F, P57072, GC75, L26, P34048, P37005, P37037, P37039, P57055, P60002, P75010, P75017, P75063, P76055, P76067, P78042, P78048, P87, P94015, SC5314	ChrR	1628067	AC	A	orf19.2622	Truncation
P94015	ChrR	1637955	CAA	C	orf19.2625	Truncation
P57072, GC75, P34048, P57055, P60002, P75010, P75016, P75063, P76055, P76067, P87	ChrR	1654949	TG	T	orf19.6288	Truncation
GC75, P75010, P75063	ChrR	1703752	GA	G	orf19.3713	Truncation
P94015	ChrR	1703900	G	GT		Truncation
P34048, P57055, P75016, P75063, P87	ChrR	1707435	ACG	A	orf19.3714	Truncation
P75063, P76067, P94015	ChrR	1724952	A	AT	orf19.610	Truncation
P60002	ChrR	1725831	CA	C	orf19.609	Truncation
P78042	ChrR	1738629	TG	T	orf19.600	Truncation
12C, 19F, P57072, GC75, P37037, P60002, P75010, P75016, P75063, P76055, P94015	ChrR	1738641	G	GA		Truncation
P94015	ChrR	1743023	CA	C	orf19.599	Truncation
P75010, P94015	ChrR	1791944	G	GA	orf19.6390	Truncation
P76055	ChrR	1793578	AT	A	orf19.6392	Truncation
P75010	ChrR	1846997	CAAAA	C	orf19.6424	Truncation
P76055	ChrR	1846997	CAA	C		Truncation
GC75, P34048, P60002, P75010, P78042	ChrR	1847052	A	ATT		Truncation
P76067	ChrR	1847124	A	AT		Truncation
P87	ChrR	1847809	A	AAG	orf19.6425	Truncation
19F, P57072, L26, P37039, P57055, P76055, P76067	ChrR	1875826	T	TTA	orf19.6445	Truncation
P57072, P76055, P76067	ChrR	1932698	TA	T	orf19.7300	Truncation
GC75, P87	ChrR	1932698	T	TAA		Truncation
P94015	ChrR	1932698	TA	T		Truncation
P94015	ChrR	1936827	CTTTCT	C	orf19.7304	Truncation
P60002	ChrR	2006484	TA	T	orf19.7340	Truncation
P57072, P76055, P94015	ChrR	2006503	GA	G		Truncation
P76067	ChrR	2006716	CA	C		Truncation
P60002, P75010	ChrR	2038862	AT	A	orf19.6606	Truncation
P76055	ChrR	2040091	TAA	T	orf19.6605	Truncation
GC75, P34048, P75063, P78042, P87	ChrR	2041502	A	AAG	orf19.6604	Truncation
P60002	ChrR	2052408	G	GTA	orf19.6598	Truncation
P57072, P34048, P57055, P60002, P76055, P76067, P78042	ChrR	2096838	AT	A	orf19.7555	Truncation
P57072, P76055, P76067	ChrR	2100696	A	AAC	orf19.7557	Truncation
GC75, P34048, P5055, P75010, P75016, P75063, P78042, P87, P94015	ChrR	2164712	CAA	C	orf19.7589	Truncation
